1 **DEFECTIVE KERNEL1 (DEK1) regulates cellulose synthesis and affects primary cell**  
2 **wall mechanics**

3

4 Lazar Novaković<sup>1, 2</sup>, Gleb E. Yakubov<sup>3</sup>, Yingxuan Ma<sup>1, 4</sup>, Antony Bacic<sup>4</sup>, Kerstin G. Blank<sup>5, 6</sup>,  
5 Arun Sampathkumar<sup>2\*\*</sup>, Kim L. Johnson<sup>4\*\*</sup>

6 <sup>1</sup>University of Melbourne, School of BioSciences, 3052, Royal Parade, Parkville, Australia

7 <sup>2</sup>Max Planck Institute of Molecular Plant Physiology, Am Mühlenberg 1, 14476, Potsdam,  
8 Germany

9 <sup>3</sup>University of Nottingham, Faculty of Science, Sutton Bonington Campus, Sutton Bonington,  
10 Leicestershire, LE12 5RD, United Kingdom

11 <sup>4</sup>La Trobe University, La Trobe Institute for Agriculture and Food, AgriBiosciences Building, 5  
12 Ring Road, 3083, Bundoora, Australia

13 <sup>5</sup>Max Planck Institute of Colloids and Interfaces, Am Mühlenberg 1, 14476, Potsdam,  
14 Germany

15 <sup>6</sup>Johannes Kepler University, Institute of Experimental Physics, Altenberger Str. 69, 4040  
16 Linz, Austria

17 \*Current address: School of Biology, Faculty of Biological Sciences, University of Leeds,  
18 Woodhouse Lane, LS2 9JT, Leeds, United Kingdom

19 \*\*Corresponding authors

20

21 Kim Johnson

22 AgriBio building, La Trobe University

23 5 Ring road, Bundoora,

24 Victoria, Australia, 3086

25 Email: [k.johnson@latrobe.edu.au](mailto:k.johnson@latrobe.edu.au)

26

27 Running title: DEK1 regulates cell wall mechanics

28

29

## 30 **ABSTRACT**

31 The cell wall is one of the defining features of plants, controlling cell shape, regulating  
32 growth dynamics and hydraulic conductivity, as well as mediating plants interactions with  
33 both the external and internal environments. Here we report that a putative  
34 mechanosensitive Cys-protease DEFECTIVE KERNEL1 (DEK1) interacts with cell wall  
35 integrity (CWI) pathways and regulation of cellulose synthesis. Our results indicate that  
36 DEK1 is an important regulator of cellulose synthesis in epidermal tissue of *Arabidopsis*  
37 *thaliana* cotyledons during early post-embryonic development. DEK1 is involved in regulation  
38 of cellulose synthase complexes (CSCs) by modifying their biosynthetic properties, possibly  
39 through interactions with various cellulose synthase regulatory proteins. Mechanical  
40 properties of the primary cell wall are altered in *DEK1* modulated lines supporting a role in  
41 maintenance of CWI. DEK1 affects stiffness of the cell wall and thickness of the cellulose  
42 microfibrils bundles in epidermal cell walls of cotyledons.

43

44 **Key words:** DEFECTIVE KERNEL1, cellulose synthase complexes, cellulose, cell wall,  
45 mechanical properties, cell wall integrity sensing.

46

## 47 **INTRODUCTION**

48 The polysaccharide rich extracellular matrix of plant cells have crucial roles in  
49 providing mechanical support, enabling water transport, cell-to-cell communication, and are  
50 a determining factor for turgor driven morphogenesis (Cosgrove, 2005). A significant  
51 component of most types of cell walls is cellulose, organized into cellulose microfibrils that  
52 impart mechanical strength to the cell wall (CMF) (Johnson et al., 2018; Zhang et al., 2019).  
53 Cellulose is synthesized by membrane bound CELLULOSE SYNTHASE (CESA) complexes  
54 (CSCs) organized in heterotrimers (Persson, 2007; Nixon et al., 2016; Polko and Kieber,  
55 2019). CESAs are transported to the plasma membrane (PM) in vesicles originating from the  
56 Golgi complex (Sampathkumar et al., 2013) and inserted into the PM by exocytosis,  
57 mediated by a large complex of proteins called the exocyst. Once inserted into the PM,  
58 CESAs associate with cortical microtubules which is mediated by CELLULOSE SYNTHASE  
59 INTERACTING1 (CSI1/POM2) proteins (Bringmann et al., 2012). Microtubules serve as  
60 guide tracks for the CSCs. Cellulose chains synthesized by CESAs coalesce into CMF in the  
61 apoplast as they are extruded into the amorphous matrix of the cell wall, which in primary  
62 walls of dicots largely consists of two other major classes of polysaccharides, pectins and  
63 hemicelluloses (Johnson et al., 2018). Once extruded, CMF get entangled into the cell wall

64 matrix and their continuous assembly by the CESAs moves the CSCs backwards in the PM  
65 (Diotallevi and Mulder, 2007). Mutants for either different *CESA* genes, such as *prc1-1*, or for  
66 regulatory proteins, such as *csi1/pom2* and *korrigan (kor)*, have decreased CSC motility  
67 resulting in decreased cellulose content (Fagard et al., 2000; Lane et al., 2001; Bringmann et  
68 al., 2012; Vain et al., 2014). In addition, post-translational modifications of CESAs, such as  
69 phosphorylation, are also found to affect CSC mobility (Sánchez-Rodríguez et al., 2017).

70 Changes in cell wall composition and interaction between its component polymers  
71 greatly affect its mechanical properties and in turn impact growth and development of the  
72 plant (Zhang et al., 2019; Wang et al., 2020). Mutants for pectin synthesis, such as either  
73 *quasimodo2* or *xyloglucan xylosyltransferase 1, 2 (xxt1xxt2)* have less stiff cell walls than  
74 wild type (WT) plants. Lack of either pectin or xyloglucans (XGs) in these mutants decreases  
75 bundling of CMFs, changing the mechanical properties of cell walls and initiating complex  
76 signaling cascades that result in developmental defects (Xiao et al., 2016; Du et al., 2020).  
77 Decreased synthesis of pectins and XGs also results in slower CSCs and less cellulose  
78 being produced, demonstrating that all components of the cell wall contribute to  
79 maintenance of its biochemical composition and integrity, in a continuous feedback loop-like  
80 manner (Xiao and Anderson, 2016; Du et al., 2020).

81 Proteins capable of sensing changes in biomechanical properties/mechanical signals  
82 at the level of the apoplast (PM/cell wall) are important for maintenance of cell wall integrity  
83 (CWI) (Engelsdorf and Hamann, 2014; Vaahtera et al., 2019). Previous studies have  
84 identified several protein families involved in CWI sensing and monitoring mechanical status  
85 of the cell wall. These proteins belong to a family of *Catharanthus roseus* receptor like  
86 kinases (CrRLK), wall associated kinases (WAKs) and mechanosensitive (MS) ion channels  
87 (Vaahtera et al., 2019). Some of these proteins (eg. WAK2 or FERONIA (FER)) interact  
88 directly with pectins via their extracellular domains, while some, such as MS ion channels,  
89 sense mechanical changes in the PM caused by mechanical perturbations of the cell wall.  
90 Changes in cell wall mechanics caused by either different developmental processes or  
91 environmental stress factors are sensed by these CWI sensors, eliciting different intra- and  
92 extra-cellular responses (Kohorn, 2009; Feng et al., 2018; Gjetting et al., 2020). Rapid  
93 mechanically activated (RMA) calcium currents are known to be activated by mechanical  
94 signalling. A functioning DEFECTIVE KERNEL1 (DEK1) protein has been shown to be  
95 crucial for RMA activity in *Arabidopsis* (Tran et al., 2017). DEK1 has been identified as a  
96 regulator of cell wall biochemical composition and structure (Johnson, 2008; Demko et al.,  
97 2014; Amanda et al., 2016; Amanda et al., 2017; Galletti et al., 2015). Roles in both cell wall  
98 regulation and transduction of mechanical signals points to a possible role of DEK1 in CWI  
99 sensing pathways.

100 DEK1 belongs to the calpain superfamily of regulatory proteases. Calpains function  
101 in a range of cellular signaling pathways by modulating their targets through proteolytic  
102 processing resulting in altered protein activity, localization, substrate specificity or stability  
103 (Ono and Sorimachi, 2012). DEK1 is the only identified member of the calpain family in land  
104 plants (Lid et al., 2002; Demko et al., 2014) and its overall structure is distinct from the  
105 mostly cytosolic animal calpains (Lid et al., 2002; Wang et al., 2003). DEK1 is an approx.  
106 240 kDa transmembrane protein with a complex structure including 21-23 transmembrane  
107 domains (TM), a LOOP domain, a cytoplasmic regulatory JUXTAMEMBRANE (JUXTA)  
108 domain and a proteolytically active CALPAIN domain close to its C-terminus (Lid et al., 2002;  
109 Johnson, 2008). Complementing *dek1* mutant lines of either *Arabidopsis* or *Physcomitrella*  
110 *patens* with only the CALPAIN domain is sufficient to rescue mutants, confirming the  
111 CALPAIN region as the catalytically active domain of the protein (Johnson, 2008; Demko et  
112 al., 2014). The catalytic activity of DEK1 CALPAIN domain is dependent on calcium (Wang  
113 et al., 2003), as shown for animal calpains (García Díaz et al., 2006). Upon cleavage,  
114 CALPAIN is released into the cytoplasm where it interacts with its yet unidentified targets  
115 (Amanda et al., 2016; Johnson et al., 2008).

116 DEK1 is a major regulator of plant development and growth (Johnson et al., 2005;  
117 Johnson et al., 2008). Loss-of-function mutants of *dek1* result in embryo lethal phenotypes in  
118 both *Arabidopsis* and maize (Becraft et al., 2002; Johnson et al., 2005). Different *dek1* RNA  
119 interference, artificial microRNA (amiRNA) lines with reduced levels of DEK1 or lines  
120 overexpressing CALPAIN domain have shown a range of severe phenotypes, such as an  
121 almost complete absence and misspecification of the epidermal layer (Johnson et al., 2005),  
122 an irregular epidermal layer made of large cells (Johnson et al., 2008) or a loss of cell-to-cell  
123 adhesion and occasional gaps in epidermal layer (Galletti et al., 2015). In addition, DEK1  
124 indirectly controls HD-ZIP IV transcription factors which are involved in the regulation of  
125 epidermal identity (Galletti et al., 2015). It was proposed that DEK1 could act as a mediator  
126 of cellular adhesion by receiving and integrating signals from the apoplast and facilitating  
127 cell-to-cell contact through maintenance of epidermal identity (Galletti et al., 2015)

128 Studies performed on an overexpressor for *CALPAIN* (*OE CALPAIN*) and on  
129 *amiRNA DEK1* lines have shown that DEK1 is a major regulator of cell wall composition and  
130 structure in the epidermis of *Arabidopsis* leaves (Amanda et al., 2016).  
131 Immunohistochemical studies on *OE CALPAIN* lines showed a significant increase in  
132 antibody density for both cellulose, high- and low-methyl esterified homogalacturonan (HG)  
133 and arabinan while the same cell wall components were less abundant in epidermal cell  
134 walls of *amiRNA DEK1* compared with the WT (Amanda et al., 2016).

135 Increased labelling of epitopes for crystalline cellulose were specifically observed in  
136 epidermal cell walls of leaves and stems with no change in overall cellulose content in

137 leaves of *OE CALPAIN-GFP* in a *dek1-3* mutant background and an *amiDEK1* line (Amanda  
138 et al., 2016). In this study, we investigated the role of DEK1 in the regulation of cellulose  
139 synthesis at a molecular level and possible roles in CWI sensing. An overexpressor of  
140 *CALPAIN* domain of *DEK1* in WT background (*pRPS5A:CALPAIN-6XHIS*, *OE CALPAIN*,  
141 Galletti et al., 2015) and an EMS single point mutant, *dek1-4*, which has a C to T nucleotide  
142 substitution in the *CALPAIN* domain and has mild phenotypes (Roeder et al., 2012) were  
143 used in this study to enable more direct comparisons to WT plants. Results of this study  
144 demonstrate that DEK1 is involved in cellulose synthesis in *Arabidopsis* cotyledon pavement  
145 cells by regulating the dynamics of CSCs. Our data also indicate that DEK1 is influencing  
146 cell wall mechanics, as well as participating in CWI sensing.

147

## 148 RESULTS

149

### 150 **DEK1 modulated lines show altered responses to Isoxaben-induced cellulose** 151 **perturbations**

152

153 To investigate the possible involvement of DEK1 in regulation of cellulose  
154 biosynthesis or CWI signaling, WT and *DEK1* modulated lines were treated with Isoxaben.  
155 Isoxaben is a plant-specific herbicide which inhibits the synthesis of cellulose through  
156 interacting with CESAs and causing them to be removed from the PM and internalized into  
157 the cell (Heim et al., 1990; Shim et al., 2018). Isoxaben-induced disruption of cellulose  
158 synthesis causes reduced root growth and cell swelling and cellulose deficient mutants have  
159 been shown to display altered responses to Isoxaben treatment (Engelsdorf and Hamann,  
160 2014; Vaahtera et al., 2019). We measured root lengths of 6-day old WT and *DEK1*  
161 modulated plants grown on media supplemented with either 2 nM Isoxaben or DMSO as a  
162 control (Figure 1A). In response to Isoxaben treatment WT plants showed a significant  
163 reduction of root length (Figure 1B). The mean root length difference between WT Isoxaben  
164 /DMSO (control) plants was -1.27 mm (95% CI -2.39, -0.0585,  $p = 0.0332$ ). For DMSO  
165 control plants no differences in root lengths between WT and *OE CALPAIN* seedlings were  
166 observed. In contrast, we observed significant differences between the mean root length of  
167 WT and *OE CALPAIN* when grown on Isoxaben, shown by the 95% CIs of the mean  
168 differences of these two groups not overlapping (Figure 1B). Estimation statistics analysis  
169 showed high mean differences of -4.63 mm (95% CI -5.35, -3.95,  $p = <0.0001$ ) in mean root  
170 length between *OE CALPAIN* plants grown on 2 nM Isoxaben supplemented media and the  
171 DMSO supplemented media controls (Figure 1B).

172 In contrast, *dek1-4* mutants were completely insensitive to Isoxaben-induced  
173 mechanical perturbation of the cell wall (Figure 1A and 1B). Mean difference in the root

174 length between plants grown on DMSO control media and plants grown on 2 nM Isoxaben  
175 was 0.0824 mm (95% CI -0.762, 0.94,  $p = 0.848$ ). Since the mean difference in root length  
176 between untreated and Isoxaben treated *dek1-4* plants was almost 0, this indicated that  
177 Isoxaben treatment had no effect on *dek1-4* mutants. In addition, no significant differences in  
178 the mean difference were observed between *dek1-4* and WT (Figure 1B, 95% CI-s are  
179 overlapping).

180

## 181 **DEK1 is involved in fine tuning of epidermal cell wall composition**

182 Studies of *DEK1* modulated lines grown on Isoxaben suggest cellulose content  
183 and/or assembly is altered. Cell wall linkage analysis was undertaken on alcohol insoluble  
184 residue (AIR) wall preparations to investigate potential wall compositional differences in 10-  
185 day old seedlings of *DEK1* modulated lines compared to WT. No statistically significant  
186 differences were found (Supplementary Figure 1, Supplementary Table 1). A trend towards  
187 reduced levels of cellulose in *OE CALPAIN* lines was observed and this was investigated  
188 further using the Updegraff (1969) method which determines crystalline cellulose content. Of  
189 the AIR, crystalline cellulose constituted 51% (w/w) in WT, 42% in *OE CALPAIN* and 48% in  
190 *dek1-4* (Figure 1C). Previous studies have shown *DEK1*-related changes in cellulose and  
191 pectin content predominantly occurs in the outer epidermal cell walls of both young and  
192 mature leaves and inflorescence stems (Amanda et al., 2016; Amanda et al., 2017).  
193 Immunofluorescence and immuno-gold labelling of cell wall epitopes was used to determine  
194 if wall composition differs at the tissue/cellular scale that may be beyond the resolution of the  
195 whole seedling chemical analyses. CBM3a labelling of cellulose epitopes showed slightly  
196 lower fluorescence intensity in the outer periclinal epidermal cell wall of both *DEK1*  
197 modulated lines compared to WT (Supplementary Figure 2A-C). TEM imaging of the  
198 cotyledon epidermal cell walls showed significantly decreased immuno-gold labelling of  
199 cellulose epitopes with CBM3a in both *DEK1* modulated lines compared with WT (Figure 1D-  
200 G). Average immuno-gold particle density for CBM3a in outer periclinal epidermal walls of  
201 10-day old cotyledons was  $14.09 \pm 1.01 \mu\text{m}^{-2}$  gold particles in WT,  $5.93 \pm 1.01 \mu\text{m}^{-2}$  ( $p < 0.0001$ )  
202 in *OE CALPAIN* and  $10.41 \pm 1.44 \mu\text{m}^{-2}$  ( $p < 0.05$ ) in *dek1-4* (Figure 1D). Cotyledon sections  
203 labelled with Calcofluor white to detect cellulose, JIM5 and JIM7 to detect partially and highly  
204 methyl-esterified HG pectin, respectively, and LM15 to detect XG revealed no obvious  
205 differences in fluorescence signal between WT and *DEK1* modulated lines (Supplementary  
206 Figure 3). We also performed immuno-gold labelling with JIM5 and JIM7 antibodies that  
207 detect HG pectins in cotyledon epidermal cell walls (Supplementary Figure 4). Our results  
208 show that *dek1-4* had significantly higher average density of JIM5 immuno-gold particles  
209 ( $26.73 \pm 1.91 \mu\text{m}^{-2}$ ,  $p < 0.0001$ ) compared with WT ( $18.86 \pm 0.82 \mu\text{m}^{-2}$ ), while *OE CALPAIN* has

210 a significantly lower count of JIM5 immuno-gold particles ( $15.79 \pm 1.10 \mu\text{m}^{-2}$ ,  $p=0.02$ )  
211 (Supplementary Figure 4A-C and 3G). Levels of partially-methyl esterified HG detected by  
212 the JIM7 antibody were significantly higher in *OE CALPAIN* ( $3.35 \pm 0.24$  particles  $\mu\text{m}^{-2}$ ,  
213  $p=0.03$ ) and significantly lower in *dek1-4* ( $1.90 \pm 0.21 \mu\text{m}^{-2}$ ,  $p=0.01$ ) compared to WT  
214 ( $2.63 \pm 0.19 \mu\text{m}^{-2}$ ) (Supplementary Figure 4D-F and 3H).

215

#### 216 **CESA transcript levels show no differences between WT and *DEK1* modulated lines**

217 Isoxaben growth assays, immuno-labeling and cell wall compositional analysis  
218 suggest *DEK1* influences levels of cellulose, particularly in epidermal walls. To determine  
219 how changes in cellulose may have come about we investigated CSCs at both the  
220 transcriptional and post-transcriptional levels. Previous studies have shown that modulation  
221 of *DEK1* affects expression of numerous cell wall-related genes, however *CESA* levels were  
222 unaffected (Amanda et al., 2016; Johnson et al., 2008). *CESA* transcript levels were  
223 investigated in 6-day old seedlings of WT, *OE CALPAIN* and *dek1-4* lines using qRT-PCR.  
224 No significant differences in transcript levels of *CESA1*, *CESA3* and *CESA6*, encoding  
225 primary wall CESAs, were observed between WT and *DEK1* modulated lines ( $p>0.05$ ) using  
226 fold change analysis (Supplementary Figure 5). These data suggest *DEK1* influences  
227 cellulose biosynthesis at the post-transcriptional level.

228

#### 229 ***DEK1* modulated lines influence mobility and not density of CSCs**

230 Changes in cellulose content could be explained by differences in the number of  
231 CSCs at the PM. *OE CALPAIN* and *dek1-4* lines were crossed with a pCESA3:GFP:CESA3  
232 mCh:TUA5 (GFP:CESA3) reporter line and the number of GFP:CESA3 complexes on  
233 pavement cell PM patches quantified (Figure 2A). The average density of CSC particles in  
234 WT was  $0.89 \pm 0.04$  particles  $\mu\text{m}^{-2}$ , *OE CALPAIN* was  $0.93 \pm 0.04$  particles  $\mu\text{m}^{-2}$  and *dek1-4*  
235 had  $0.82 \pm 0.04$  particles  $\mu\text{m}^{-2}$ . Thus, no statistically significant differences were detected in  
236 CSC particle density between WT and *DEK1* modulated lines (Figure 2B, Students t-test,  
237  $p>0.05$ ). We then proceeded to investigate if *DEK1* could affect the velocity of the CSC.  
238 Investigation of CSC velocity is commonly used as a proxy for determining cellulose  
239 synthesis rates at the cellular level. In brief, the more cellulose CESAs synthesize, the faster  
240 CSCs will move along within the plane of the PM (Paredes et al., 2006; Diotallevi and  
241 Mulder, 2007; Fujita et al., 2011). CSCs at the PM of the periclinal epidermal cells of 3-day  
242 old cotyledons were tracked during 10-min time lapses (Figure 2C) and kymographs of GFP-  
243 labelled CESA3 particles (Figure 2D) were used to obtain velocities of CSCs (Figure 2E).  
244 CSC velocities in both *OE CALPAIN* and *dek1-4* mutant lines were significantly reduced  
245 compared to WT (Figure 2E). WT CSCs had an average velocity of  $192.41 \pm 4.16 \text{ nm min}^{-1}$ ,

246 *OE CALPAIN*  $124.11 \pm 3.01 \text{ nm min}^{-1}$  and *dek1-4*  $113.91 \pm 3.09 \text{ nm min}^{-1}$ . The reduction in  
247 CSC velocity in both *DEK1* modulated lines was highly statistically significant compared to  
248 WT (Unpaired Student t-test,  $p < 0.0001$ ). A reduction of CSC velocities in the periclinal cell  
249 walls of cotyledon pavement cells is consistent with the findings of immuno-histochemical  
250 assays that indicate significantly reduced cellulose levels in *OE CALPAIN* compared to WT  
251 (Figure 1D).

252

### 253 **CSC membrane trafficking is significantly altered in *DEK1* modulated lines**

254 To investigate if *DEK1* might be regulating other functional properties of CSC  
255 complexes, delivery rate of CSCs and their lifetime at the PM was examined. Fluorescence  
256 recovery after photobleaching (FRAP) experiments were performed on *OE CALPAIN* and  
257 *dek1-4* plants crossed into a GFP:CESA3 reporter line to determine if the rate of exocytosis  
258 of CSCs into the PM was altered. Imaging of GFP:CESA3 particles during the 10 min  
259 following photobleaching (Figure 3A) showed CESAs in *OE CALPAIN* had the fastest  
260 recovery after FRAP (Figures 3B and 3C) with  $3.96 \pm 0.36 \text{ CSC } \mu\text{m}^2\text{h}^{-1}$  ( $p = 0.0188$ )  
261 compared to WT with a CSC recovery rate of  $2.86 \pm 0.25 \text{ CSC } \mu\text{m}^2\text{h}^{-1}$ . The lowest CSC  
262 recovery rate post-FRAP was observed in *dek1-4* (Figures 3B and 3C) with only  $1.87 \pm 0.15$   
263  $\text{CSC } \mu\text{m}^2$  ( $p = 0.0033$ ). Studies of the lifetime of CSC particles at the PM showed the  
264 opposite trends (Figure 3D). *OE CALPAIN* CSCs spent an average of  $14.33 \pm 4.69 \text{ min}$  in  
265 the PM, which was significantly shorter than WT CSCs with  $19.56 \pm 1.42 \text{ min}$  ( $p = 0.0288$ ),  
266 while *dek1-4* CSCs stayed significantly longer in the PM ( $25.36 \pm 1.73 \text{ min}$ ,  $p = 0.0152$ ) before  
267 undergoing endocytosis (Figure 3D).

268

269

### 270 ***DEK1* affects cell wall mechanics of cotyledon pavement cells**

271

272 The defects in CESA dynamics observed in cotyledon pavement cells prompted us to  
273 examine the possible role of *DEK1* in influencing structure and physical properties of the  
274 CMFs and consequently the mechanical properties of the cell wall. We used atomic force  
275 microscopy (AFM) to image and mechanically characterize native cell walls.

276 We performed AFM imaging on dry cell wall monolayers of isolated abaxial epidermal  
277 cell walls from cotyledons of 10-day old *Arabidopsis* seedlings (Figure 4A-C; Supplementary  
278 Figures 6 and 7). Imaging was done on the inner surface of the abaxial epidermis outer  
279 periclinal walls, which is the newest deposited layer of the cell wall, abutting the PM  
280 (Supplementary Figure 6). Cell wall images of WT clearly show the CMF network (Figure 4A-  
281 C, Supplementary Figure 8), as reported for onion epidermal cell wall monolayers imaged by



282 AFM (Kafle et al., 2014; Zhang et al., 2016). Differences in the thickness of CMFs were  
283 observed in *OE CALPAIN* and *dek1-4* (Figure 4A-C) compared to WT. In *OE CALPAIN*,  
284 thicker bundles of CMFs were observed as well as amorphous deposits on the cell wall  
285 surface (Figure 4B). Diameters of the CMF bundles were quantified from height channel  
286 images (Supplementary Figure 8). Results showed that the CMF bundles of both *OE*  
287 *CALPAIN* and *dek1-4* had higher mean diameters than WT CMFs (Figure 4D). Mean  
288 diameter of WT CMFs was  $11.09 \pm 0.03$  nm. For *OE CALPAIN* CMF it was  $16.21 \pm 0.03$  nm,  
289 and for *dek1-4* it was  $15.74 \pm 0.03$  nm. These differences are highly statistically significant ( $p$   
290  $<0.0001$ ). Analysis of the distribution of CMF diameters shows that both *DEK1* modulated  
291 lines have a higher frequency of bundled CMFs in the range of 15-40 nm whereas WT CMFs  
292 are mostly represented in the range of 1-15 nm, implying that WT has either an abundance  
293 of single CMFs (~3.5 nm is the diameter of a typical CMF (Zhang et al., 2016)) or smaller  
294 bundles of CMFs (Figure 4E).

295 Previous studies have shown that changes of cell wall composition in cell wall  
296 mutants of *Arabidopsis* can affect mechanical behaviour of the cell wall and CMF properties  
297 (Xiao and Anderson, 2016). To examine cell wall mechanical properties in *DEK1* modulated  
298 lines, we performed AFM nanoindentation on the isolated abaxial epidermal cell walls of 10-  
299 day old *Arabidopsis* cotyledons. Nanoindentation generated force-displacement curves,  
300 which were used to calculate cell wall elastic moduli (Supplementary Figure 9A, C, E). It is  
301 worth noting that within all analyzed genotypes, a large range of elastic moduli was observed  
302 (Figure 4F, Supplementary Figure 9B, D, F). In WT, values ranged from 0.1 MPa to 5 MPa,  
303 which is consistent with previous data showing highly heterogeneous distribution of cell wall  
304 mechanical properties (Yakubov et al., 2016). Mean apparent elastic modulus of WT was  
305  $0.71 \pm 0.01$  MPa. Analysis of the apparent elastic modulus in *OE CALPAIN* and *dek1-4*  
306 suggests that both lines had significantly stiffer cell walls compared to WT. *OE CALPAIN*  
307 had an elastic modulus of  $1.52 \pm 0.03$  MPa, while *dek1-4* had an elastic modulus of  $1.11 \pm$   
308  $0.02$  MPa (Figure 4F). These results suggest *DEK1* is involved in regulating and maintaining  
309 mechanical properties of the cell wall.

310

### 311 **Stiffer cell walls of *OE CALPAIN* and *dek1-4* exhibit absence of ectopic lignification**

312

313 The altered cell wall properties in *DEK1* modulated lines, including cellulose levels,  
314 CMF thickness and cell wall mechanics along with changes in CESA dynamics led us to  
315 investigate if these changes could be associated with disrupted CWI sensing/signalling  
316 pathways. One of the regularly observed responses from either cell wall damage or  
317 disrupted cell wall synthesis, caused by either abiotic or biotic factors is ectopic deposition of  
318 lignin. WT and *DEK1* modulated 6-day old seedlings were grown overnight in liquid MS

319 media supplemented with either DMSO control or 600 nM Isoxaben and then stained with  
320 phloroglucinol to detect lignin. WT developed strong lignin staining in the elongation region  
321 behind the root tip in response to Isoxaben treatment (Figure 5A and B), while both *DEK1*  
322 modulated lines developed weak, barely detectable lignin staining (Figure 5A and B).

323

### 324 ***OE CALPAIN* and *dek1-4* show altered responses to salt and osmotic stress**

325

326 To determine the response of *DEK1* modulated lines to other types of cell wall  
327 damage, salt treatment was used to disrupt pectin HG Ca<sup>2+</sup> cross-linking in cell walls.  
328 Transfer of 5-day old plants from control MS media to MS media supplemented with 140 mM  
329 NaCl for 48 h resulted in severe inhibition of root growth of WT (Figure 5C). Mean difference  
330 of root growth between WT grown on control media and plants transferred to NaCl  
331 supplemented media was -6.25 mm (95% CI -6.71, -5.81,  $p < 0.0001$  two-sided permutation t-  
332 test). The response of *OE CALPAIN* plants to NaCl was more moderate (Figure 5C and D)  
333 with a root growth mean difference between control and salt-grown plants of -3.02 mm (95%  
334 CI -3.29, -2.75,  $p < 0.0001$  two-sided permutation t-test). A similar insensitive response to that  
335 of Isoxaben treatment was observed for *dek1-4* NaCl treatment (compare Figures 1B and  
336 5D), with a small mean difference between control and NaCl-grown plants (Figure 5D). In  
337 general, both *DEK1* modulated lines showed reduced sensitivity to NaCl when compared to  
338 WT (Figure 5C and 5D).

339 CWI is also affected by changes in osmotic pressure of the cell, which causes either  
340 protoplast shrinking or swelling depending on whether the osmotic pressure drops or rises,  
341 respectively, in the protoplast. Both types of changes have an impact on cell wall  
342 composition and its integrity (Vaahtera et al., 2019). This led us to investigate osmotic  
343 responses in WT and *DEK1* modulated lines by growing them on 200 mM mannitol  
344 supplemented MS media. Response to mannitol treatment in 6-day old light grown plants  
345 was shown to have a similar trend to Isoxaben-induced cell wall perturbations (Figure 5E).  
346 Mannitol treatment had very little effect on WT (Figure 5F), with a root length mean  
347 difference between mannitol- and MS-grown plants of -2.18 mm (95% CI -2.95, -1.45,  
348  $p < 0.0001$ ). In contrast, *OE CALPAIN* plants showed higher sensitivity to mannitol treatment  
349 with root length mean difference between mannitol treated and control grown plants of -4.05  
350 mm (95% CI -4.7, -3.36,  $p < 0.0001$ ), that is, almost double the decrease in root length of  
351 treated/control plants compared with WT (Figure 5F). Finally, *dek1-4* roots showed  
352 decreased sensitivity to mannitol, similar to that observed in Isoxaben and salt assays. Root  
353 length mean difference between mannitol and control treated *dek1-4* plants was -1.73 mm  
354 (95% CI -2.03, -1.42,  $p < 0.0001$ ). The effect of mannitol on root growth of *OE CALPAIN*  
355 plants was statistically significant in both WT and *dek1-4*, since there was no overlapping of

356 *OE CALPAIN* root length 95% CI with root length CIs of both WT and *dek1-4* (Figure 5F). In  
357 contrast, both WT and *dek1-4* had no statistical differences in response to mannitol  
358 treatment since their root length 95% CI overlap (Figure 5F).

359 In conclusion, DEK1 affects the synthesis of both cellulose and pectins in early  
360 developmental stages of *Arabidopsis*. Both *DEK1* modulated lines show decreased  
361 crystalline cellulose in outer epidermal cell wall of cotyledons. Velocity of CSCs in the  
362 epidermal pavement cell PMs, which is used as a proxy for the biosynthetic activity, is  
363 significantly reduced in both *DEK1* modulated lines, while the density of CSC complexes is  
364 similar to that of the WT. PM dynamics of CSCs is significantly altered in both lines, with *OE*  
365 *CALPAIN* CSCs having significantly slower CSC exocytosis and faster endocytosis, while  
366 these features of CSC dynamics were reversed in *dek1-4* plants. Epidermal cell wall  
367 stiffness was significantly increased in both *DEK1* modulated lines compared to WT. In  
368 addition, *DEK1* modulated lines exhibited changes in their ability to detect changes in CWI,  
369 most notably hypersensitivity of *OE CALPAIN* and complete insensitivity of *dek1-4* to  
370 Isoxaben-induced inhibition of cellulose synthesis and ectopic lignification.

371

## 372 **DISCUSSION**

373

### 374 ***DEK1 in cellulose assembly***

375

376 DEK1 is proposed to act as a mechano-sensor protein at the PM (Amanda et al.,  
377 2016; Tran et al., 2017). Upon perception of mechanical stimuli, originating either from other  
378 growing cells in the tissue or from a cell's own turgor pressure, or an external environmental  
379 signal, the CALPAIN domain of DEK1 is proposed to be auto-catalytically released into the  
380 cytoplasm (Amanda et al., 2016; Tran et al., 2017). DEK1 CALPAIN likely acts as a  
381 regulatory protease (Wang et al., 2003; Johnson et al., 2008) and downstream signalling  
382 initiates changes in cell wall biosynthesis/remodelling and epidermal specification (Demko et  
383 al., 2014; Amanda et al., 2016; Amanda et al., 2017; Galletti et al., 2015). In this study we  
384 show DEK1 influences CESA dynamics, cellulose content, pectin re-structuring and  
385 mechanical properties of epidermal walls, and propose a role in CWI sensing.

386 It is currently understood that slower movement of CSCs across the PM, a proxy for a  
387 lower rate of cellulose biosynthesis, results in less cellulose synthesized (Diotallevi and  
388 Mulder, 2007). The significant reduction of CSC velocity in *OE CALPAIN* and *dek1-4* (Figure  
389 2D and E) support a role for DEK1 in regulation of CESA dynamics. Mutants for  
390 *CESA6/prc1-1*, and *CESA1/any1*, have significantly reduced CESA velocities in dark grown  
391 hypocotyls (Bischoff et al., 2011) that is proposed to be the major cause of a 30% reduction  
392 in growth (Fagard et al., 2000). There is no data in the literature that CESA proteins undergo

393 proteolytic processing after insertion (by exocytosis) into the PM. RT-qPCR analysis of  
394 *CESA1,3* and *6* expression levels, and measurement of CESA density at the cotyledon  
395 pavement epidermal cell PMs showed no difference between WT and *DEK1* modulated  
396 lines. These data support DEK1 regulation of CSCs at the post-translational level. An  
397 interesting possibility is that DEK1 regulates CSC activity indirectly, potentially through  
398 interactions with either CESA regulatory proteins or the cytoskeleton components that guide  
399 CSCs. To more precisely define the mechanism, crosses of *DEK1* modulated lines to  
400 mutants of different CESA regulatory proteins as well as with their reporter lines should be  
401 undertaken. Candidates would include CSI1/POM2 that facilitate binding between CSCs and  
402 CMTs (Gu et al., 2010; Bringmann et al., 2012), the endo-1,4-beta-glucanase KORRIGAN  
403 (KOR) involved in CESA regulation (His et al., 2001; Vain et al., 2014) and PATROL1 (PTL1)  
404 that interacts with exocyst complex proteins and CSI1/POM2 to deliver CSCs to the PM (Zhu  
405 et al., 2018). Mutants *kor1-1* and *kor1-3* display a similar reduction in CSC mobility to *DEK1*  
406 modulated lines when compared to WT plants (Vain et al., 2014). In addition *kor* mutants  
407 have been shown to have decreased cellulose content, but also increased pectin  
408 abundance, which was interpreted as a compensatory mechanism and part of feedback  
409 loops connecting cellulose and pectin synthesis to changes in the mechanical properties of  
410 the cell wall (His et al., 2001).

411 It could be conceivable that DEK1 is involved in CSC guidance along CMTs, either by  
412 modifying the activity and properties of CSI1/POM2 or some other CESA-CMT interface  
413 proteins. Reduced CSCs velocities and cellulose content is observed in *pom2-1* mutants  
414 compared to WT plants as well as spiral twisting of the entire rosette and leaves. Previous  
415 studies of lines with reduced levels/activity of *DEK1*, including *dek1-4*, showed epinastic  
416 curling of cotyledons and leaves (Roeder et al., 2012; Galletti et al., 2015). CMTs are  
417 responsive to mechanical stress and assumed to align in the direction of maximal stress  
418 (Hamant et al., 2008). CMTs were shown to re-organize normally in *dek1-4* mutants in  
419 response to ablation in cotyledons, however, were more highly orientated than in WT  
420 pavement cells due to changes in cell shape (Galletti et al., 2015). A study in animals has  
421 shown that a non-proteolytic variant of CALPAIN, CALPAIN6 (CAPN6), stabilizes  
422 microtubules by binding to them and preventing their de-polymerization (Tonami et al., 2011).  
423 Unlike CAPN6, DEK1 CALPAIN has proteolytic activity, and it would be interesting to  
424 investigate if DEK1 CALPAIN can interact with CMT and potentially disrupt binding of CESA  
425 complexes (Tonami et al., 2011).

426

427 Upregulation of the exocytotic module of the CSC trafficking machinery in *OE*  
428 *CALPAIN* (Figure 3B and C) could be one explanation for the faster exocytosis of the  
429 CESAs, as observed by faster post-FRAP recovery of CSC particles (Figure 3A and B).

430 Exocytosis of CSCs is regulated by a large protein complex (Polko and Kieber, 2019), which  
431 interacts with CS1 and PTL1 to deliver CSCs to the PM (Zhu et al., 2018). The frequency of  
432 CSC insertions and alignment with the CMT was highly decreased and the delivery rate of  
433 CSC severely diminished in *csi1-3/ptl1-2* double mutants. In addition, *ptl* mutants also have  
434 lower CSC velocities, and both *ptl1-2* and *csi1-3/ptl1-2* lines have significant decreases in  
435 cellulose content (Zhu et al., 2018). The contrasting effect which *OE CALPAIN* and *dek1-4*  
436 have on CSC PM trafficking could mean that DEK1 is interacting with several components  
437 involved in CSC trafficking to (and in) the PM, and that its role in signalling involves multiple  
438 target proteins.

439

#### 440 ***DEK1 in CWI sensing***

441

442 Isoxaben growth assays point to a possible role of DEK1 in CWI signalling and  
443 maintenance (Figure 1A and 1B). CWI maintenance systems are thought to be activated in  
444 response to reduced cellulose levels, such as induced by Isoxaben treatment (Denness et  
445 al., 2011; Hamann, 2014; Basu et al., 2016) to limit damage and growth. The hypersensitivity  
446 to Isoxaben in *OE CALPAIN* plants (Figure 1A and 1B) could be a combination of reduced  
447 cellulose and increased activation of CWI signaling as a result of excess CALPAIN levels. A  
448 slight trend towards reduced cellulose levels was also observed in *dek1-4* in which CALPAIN  
449 activity is modulated by a single nucleotide polymorphism (Roeder et al., 2012). The  
450 insensitivity to Isoxaben observed in *dek1-4* suggests CWI signaling is impaired and  
451 supports a role for DEK1 in the sensing/signaling pathways. DEK1 is likely a multifaceted  
452 regulatory protease, participating in different regulatory networks during early and late  
453 developmental stages and different tissue types. In *Arabidopsis* DEK1 could additionally  
454 initiate compensatory pathways as a result of cell wall changes as has been shown to occur  
455 in mutants with defects in cell wall biosynthesis (His et al., 2001; Hu et al., 2019).

456 The epidermis is a key regulator of plant growth and this is influenced by the  
457 mechanical properties of the cell wall (Galletti et al., 2016; Moulia et al., 2021). In *DEK1*  
458 modulated lines, pectins could act as a compensatory mechanism to counteract the  
459 decreased production of cellulose in order to preserve the CWI and lead to increased  
460 stiffness of the cell wall (His et al., 2001). DEK1 has previously been shown to regulate  
461 expression of pectin-related genes, including *GAUTs* and pectin methyltransferases as well  
462 as altered deposition of pectic polysaccharides in leaf epidermal cell walls of *OE CALPAIN*  
463 *GFP* (Amanda et al., 2016; Amanda et al., 2017). Mutants in pectin methyltransferase,  
464 *quasimodo2* and *tumorous shoot development2*, have decreased levels of both HGs and  
465 cellulose, decreased CESA velocities, thinner and more fragmented CMFs (Mouille et al.,  
466 2007; Du et al., 2020), while mutants in putative galacturonic acid transferase, *quasimodo1*,

467 experience severe defects in cell-to-cell adhesion due to low HG-content (Bouton et al.,  
468 2002; Verger et al., 2018). Increased partially methyl-esterified HG in *dek1-4* is consistent  
469 with a role for pectin-related increased bundling of CMFs in this line. Stiffer cell walls in *OE*  
470 *CALPAIN*, with reduced levels of partially methyl-esterified HG and increased levels of highly  
471 methyl-esterified HG requires further investigation. The relationship between the degree of  
472 HG methyl-esterification and cell wall stiffness is unresolved. It could depend upon local  
473 concentrations of  $\text{Ca}^{2+}$  in the apoplast (Wang et al., 2020), orientation of the cell wall, such  
474 as anticlinal vs periclinal cell walls (Haas et al., 2020), activity of polygalacturonases (Yang  
475 et al., 2018) and many as yet unknown factors. Changes in interactions between pectins and  
476 CMF could also influence mechanical properties of the cell wall in *DEK1* modulated lines  
477 (Figure 4E). NMR studies of 'never dried' onion epidermal cell walls have shown that HGs  
478 make the majority of contacts with CMFs, which could mean that they act as primary  
479 mechanical tethers (Wang et al., 2015). Pectins affect cell wall mechanical properties  
480 through poro-elastic effects, without impacting the structural properties of cellulose (Lopez-  
481 Sanchez et al., 2015).

482 Regulation of cell wall biomechanics in response to mechanical stress and the  
483 potential influence on cell and plant morphogenesis has highlighted the importance of CWI.  
484 CWI pathways are now seen as key to modulating activity of wall biosynthesis/remodelling  
485 and growth. Previous studies have revealed ectopic lignification as an important element of  
486 CWI maintenance responses (Denness et al., 2011; Hamann, 2014; Vaahtera et al., 2019).  
487 Lack of ectopic lignification was expected in *dek1-4* since this line showed insensitivity to  
488 Isoxaben suggesting a reduced capacity to initiate CWI responses. The loss of ectopic  
489 lignification in *OE CALPAIN* was intriguing. It is possible that constitutive overexpression of  
490 *CALPAIN*, proposed to activate mechanical stress responses, has been dampened over-  
491 time by other regulatory pathways, limiting lignin production, however this needs further  
492 investigation.

493 Sensitivity of *DEK1* modulated lines to abiotic stresses such as salt and osmotic  
494 pressure (simulating drought) add further support to the potential role in CWI signalling  
495 (Figure 5C-F). Different stress conditions are known to lead to similar responses of plants in  
496 terms of growth and morphogenesis (Tenhaken, 2014). However, the underlying molecular  
497 mechanism of these changes and their associated signalling cascades can differ greatly.  
498 CWI sensors of the CrRLK family, including FER and THE1 are involved in responses to  
499 stress, mediated by RALF peptide binding (Feng et al., 2018; Blackburn et al., 2020; Zhang  
500 et al., 2020). RALF peptides are known to be processed by subtilin-like proteases  
501 (Stegmann et al., 2017), however, other proteases such as DEK1 may be involved in  
502 generating mature RALF ligands. DEK1 signalling cascades are still completely unknown  
503 and further work is required to determine if cross-talk between CrRLK signalling and DEK1

504 pathways occur. Identification of CALPAIN targets through the use of targeted proteomics  
505 approaches is essential for understanding the pathways through which DEK1 acts, and its  
506 precise role in plant growth and development, including CWI.

507

508

## 509 MATERIAL AND METHODS

510

### 511 Plant resources

512 *Arabidopsis thaliana* Columbia-0 (Col-0) ecotype was used as wild type (WT) control.  
513 *dek1-4* is an EMS single point mutant (Roeder et al., 2012) backcrossed into Col-0 as  
514 described in (Galletti et al., 2015). The CALPAIN overexpression construct  
515 *pRPS5A:CALPAIN:6X HISTIDINE* (*OE CALPAIN*), with hygromycin resistance in Col-0 wild  
516 type background is described in Galletti et al., 2015. For CSC dynamics analysis we used  
517 *OE CALPAIN* and *dek1-4* crossed into CSC reporter line *pCESA3:GFP:CESA3* (Desprez et  
518 al., 2007).

519 Plants were grown vertically in petri dishes, on MS 1% (w/w) sucrose media, 0.8%  
520 agar, pH 5.8 (Murashige and Skoog, 1962), without vitamins. Plants were grown in Percival  
521 growth cabinets, model CU36L/LT (Percival Scientific, Perry, Iowa, USA), at a temperature  
522 of 21°C and light intensity of 95-111 mol m<sup>-2</sup> s<sup>-1</sup>. Growth conditions used in different  
523 experiments are detailed in sections below.

524 F2 *DEK1* modulated lines crossed with *GFP:CESA3* were used for CESA dynamics  
525 experiments. Non-genotyped segregating F2 plants were grown on MS 1% sucrose media  
526 for 3 days, imaged and then genotyped for identification of *DEK1* modulated lines containing  
527 *pCESA3:GFP:CESA3* constructs. After confocal imaging, *OE CALPAIN*  
528 *pCESA3:GFP:CESA3* F2 plants were transferred onto MS 1% sucrose media supplemented  
529 with 10 µg ml<sup>-1</sup> hygromycin. Plants were grown horizontally for 10-14 days together with Col-  
530 0 and *GFP CESA3* plants as positive controls. Only imaging data for *OE CALPAIN*  
531 *pCESA3:GFP:CESA3* plants which survived the hygromycin selection were used for CESA  
532 dynamics analysis.

533 *dek1-4 pCESA3:GFP:CESA3* plants were transferred to MS 1% sucrose media  
534 supplemented with Plant Preservative Mixture (Plant Cell Technology, Washington DC,  
535 USA) diluted in ratio 1:1000 after CESA imaging. When plants recovered and developed first  
536 true leaves (7-10 days post imaging), DNA was isolated using Edwards buffer method  
537 (Edwards et al., 1991) and analysed by dCAPS (Neff et al., 1998) (Supplementary Table 2)  
538 and KASP genotyping (LGC Genomics, Berlin, Germany). Only imaging data for *dek1-4*  
539 homozygous plants was used in further CESA dynamics analysis.

540

#### 541 **Analysis of *CESA* transcript levels**

542 RNA was isolated from 6-day old *Arabidopsis* plants using the QIAGEN RNeasy Mini  
543 Kit (ID: 74104, QIAGEN, Hilden, Germany). RNA quality was determined using a Nanodrop  
544 2000/2000c spectrophotometer (Thermo Fisher Scientific, Waltham, MA, USA). For relative  
545 quantification (RT)-qPCR experiments, cDNA synthesis was performed using Maxima First  
546 Strand cDNA Synthesis Kit (K1641, Thermo Fisher Scientific, Waltham, MA, USA) using 1  
547 µg of RNA. Power SYBR Green Mastermix (4367659, Thermo Fisher Scientific, Waltham,  
548 MA, USA) was used for RT-qPCR and runs performed in 384 well plates (AB3384, Thermo  
549 Fisher Scientific, Waltham, MA, USA) in 5 µl reactions. Primers used for RT-qPCR are  
550 outlined in Supplementary Table 2. Lightcycler ABI 7900 HT (Applied Biosystems, Foster  
551 City, California, United States) lightcycler was used for RT-qPCR using amplification,  
552 conditions: 50° C – 2 min; 95° C –10 min; 40 cycles of 95° C for 15 s, 60° C for 1 min; 95° C  
553 for 15 s, 60° C for 15 s, 95° for 15 s. qPCR data was analyzed using SDS v 2.4.1 analysis  
554 software (Thermo Fisher Scientific, Waltham, MA, USA). *CESA* expression levels were  
555 normalized against *GLYCERALDEHYDE-3-PHOSPHATE DEHYDROGENASE (GADPH)*  
556 which was used as a reference gene.

557 Relative gene expression values expressed as fold changes were calculated the  
558 method of (Livak and Schmittgen, 2001). *CESA* expression levels were treated as 1 in Col-0  
559 WT and values in *DEK1* modulated lines were calculated compared to Col-0. Gene  
560 expression fold changes lower than 0.5 and higher than 2.5, compared to Col-0, were  
561 treated as significant.

562

#### 563 **Cell wall composition analysis**

564

565 Cell wall composition analysis was performed on pooled 10-day old whole seedlings.  
566 Analysis of the cell wall polysaccharide composition of alcohol insoluble cell wall residues  
567 (AIR) Col-0 and *DEK1* modulated lines was performed according to (Pettolino et al., 2012).  
568 Analysis of the total crystalline cellulose in seedlings was performed using Updegraff assay  
569 (Updegraff, 1969) of AIR (10-50 mg).

570

#### 571 **Immunofluorescence labelling**

572

573 Cotyledon tissues from 10 day old seedlings were fixed and embedded according to (Wilson  
574 and Bacic, 2012). A Leica Ultracut R microtome (Leica Microsystems, Germany) was used  
575 to obtain 250 nm thin sections and labelled with JIM5 (low methyl esterified HG; (Knox et al.,



576 1990)), JIM7 (high methyl esterified HG; (Knox et al., 1990)), and LM15 (xyloglucan; (Marcus  
577 et al., 2008)) antibodies at 1:10 dilution, secondary antibody was Alexa Fluor 488 goat anti-  
578 rat IgG (H+L) (Life Technology; # A48262) with 1:100 dilutions. For crystalline cellulose  
579 labelling, CBM3a (Blake et al., 2006) was used at 1:50 dilution, the secondary antibody used  
580 was anti-6x-His tag monoclonal (Invitrogen, # MA1-21315) with 1:100 dilutions, the third  
581 antibody was Alexa Fluor 488 goat anti-mouse IgG (H+L) (Life Technology; # A11006) with  
582 1:100 dilutions. Images were acquired with an Olympus BX53 microscope under GFP  
583 channel. Calcofluor white (0.02%) was used to stain cellulose and images were acquired  
584 under UV channel. Two biological replicates from two independent lines were performed.

585

### 586 **Transmission-electron microscopy (TEM) and immunolabelling**

587

588 Thin sections (~80 nm) from cotyledon tissues were acquired as stated above. Antibody  
589 labelling and post-staining were performed according to (Wilson and Bacic, 2012). For pectin  
590 labelling, JIM5 and JIM7 antibodies were used at 1:15 dilution, secondary antibodies used  
591 was goat anti-rat 18 nm gold conjugated secondary antibody (Jackson Immuno Research  
592 #112-215-167) at 1:20 dilutions. For crystalline cellulose labelling, CBM3a at 1:50 dilution,  
593 secondary anti-6x-His tag monoclonal antibody (Invitrogen, # MA1-21315) at 1:175 dilutions,  
594 and the third antibody was goat anti-mouse 12 nm gold conjugated secondary antibody  
595 (Jackson Immuno Research #115-205-166) at 1:35 dilution. Grids were post-stained using  
596 2% uranyl acetate for 10 min and Reynold's lead citrate for 1 min. Grids were imaged using  
597 a Jeol 2100 EM equipped with a Gatan Orius SC 200 CCD camera. Two biological replicates  
598 from two independent lines were performed.

599

### 600 **Spinning disc confocal microscopy of CSC**

601

602 Three-day old seedlings were mounted on microscope object slides and imaged  
603 using instruments and settings as described in (Sampathkumar et al., 2013). Photobleaching  
604 used to access CSC trafficking dynamics was performed using a FRAP/PA system (Roper  
605 Scientific, Acton, MA, USA) integrated into the spinning disc confocal imaging system, as  
606 described in (Sampathkumar et al., 2013).

607

### 608 **CSC timelapse processing**

609 Image processing was performed using ImageJ software (Rasband, W., NIH,  
610 Bethesda, MD, USA). Brightness and contrast of the raw time-lapses were modified.  
611 Subtract background function (rolling ball size 30-40 pixels) and Walking average plugin

612 (three frames averaged) were used to remove background noise and to obtain clearer  
613 images.

614 Density of CSC particles was determined from confocal time-lapse images using  
615 IMARIS 7.4 image analysis software (Bitplane, Oxford Instruments, Oxford, United  
616 Kingdom). Time-lapse image stacks were pre-processed in ImageJ as described above and  
617 imported into IMARIS. Spot detection and tracking function of the IMARIS was used to  
618 detect and label CSC particles. CSC particle numbers used to calculate mean CSC density  
619 were taken from three random timeframes from each analyzed pavement cell from every  
620 imaged cotyledon for each of the analyzed genotypes. Density was calculated as mean of  
621 CSC particles density per one  $\mu\text{m}^2$  for each cell, plant and genotype.

622 Velocity analysis of CESA particles imaged using confocal microscopy was  
623 performed using Fluorescent Image Evaluation Software for Tracking and Analysis (FIESTA)  
624 software (Ruhnow et al., 2011), which is available under open license from FIESTA,  
625 University of Dresden Fusion Forge Wiki webpage ([https://fusionforge.zih.tu-  
626 dresden.de/plugins/mediawiki/wiki/fiesta/index.php/FIESTA](https://fusionforge.zih.tu-dresden.de/plugins/mediawiki/wiki/fiesta/index.php/FIESTA)). Raw confocal time-lapse  
627 images were imported into FIESTA. Maximum signal intensity projections were used to  
628 generate kymographs. Kymographs were generated from the CSC trajectories manually  
629 drawn using segmented line tool in FIESTA.

630 Analysis of the data obtained by FRAP was performed using a modified version of  
631 the CSC density measurement method described above. CSC particles detection and  
632 quantification was performed on  $9 \times 9 \mu\text{m}$  cell patches rather than  $10 \times 10 \mu\text{m}$ , which were  
633 the dimensions of bleached surface. After performing detection of fluorescently labelled CSC  
634 particles using IMARIS software, CSC post-FRAP density, recovery rates and average  
635 plasma membrane life-time of the complexes was calculated as described in  
636 (Sampathkumar et al., 2013).

637

### 638 **Cell wall isolation for AFM topographical imaging and nanoindentation**

639 Cotyledon pavement epidermal cell walls were isolated for analysis with the atomic  
640 force microscope (imaging and nanoindentation). Rectangular microscope coverslips (Roth,  
641 Karlsruhe, Germany) were covered with  $200 \mu\text{l}$  of 0.01% poly-D-lysine-hydrobromide (PDL;  
642 P6407, Sigma Aldrich, St. Luis, MO, USA) in deionised water. Coverslips were left for 15-20  
643 min to allow the PDL to polymerize, after which coverslips were washed thoroughly with  
644 deionized water and dried in a stream of nitrogen.

645 We used 10-day old seedlings of *Arabidopsis* to obtain cotyledons for cell wall  
646 isolation. The larger of the two cotyledons was cut off using surgical tweezers, placed on a  
647 PDL coated coverslip (with the abaxial side facing the coverslip) and the following steps

648 were performed under a stereomicroscope (Zeiss Stemi 508, Zeiss, Jena, Germany). The  
649 cotyledon was pressed gently on one side using surgical tweezers and then a vertical cut  
650 was made using a micro-surgery scalpel (Fine Scientific Tools, Vancouver, Canada), across  
651 the middle of the cotyledon in a direction perpendicular to its longer axis. After the vertical  
652 cut, a second cut was performed in parallel to the longer cotyledon axis to remove all leaf  
653 tissues and expose the abaxial epidermis with patches of the cell wall monolayers on its  
654 edge (Supplementary Figure 6). Regions with cell wall monolayers were observable under  
655 50x magnification as small opaque patches of material on the edge of the abaxial epidermis  
656 (Supplementary Figure 6).

657 The remaining parts of the dissected cotyledon were carefully attached to the surface  
658 with nitrocellulose based red stained adhesive (nail polish) to immobilize the sample during  
659 imaging and mechanical probing. Adhesive was applied with an injection syringe needle,  
660 carefully avoiding regions with cell wall monolayers and left to cure for 5-10 seconds.  
661 Samples were then incubated with 500  $\mu$ l of 1% SDS for 20-30 s to remove organelles,  
662 proteins and other cellular components released during the cotyledon dissection. SDS was  
663 removed by washing with deionized water, ensuring that the dissected cotyledon does not  
664 curl up on the coverslip. For high-resolution AFM topographical imaging the samples were left  
665 overnight to completely dry while they were stored in water for mechanical measurements  
666 to prevent loss of native mechanical properties.

667

668

### 669 **AFM topographical imaging**

670

671 For measuring the CMF diameter, a Dimension 3100 AFM (Veeco, Plainview, NY,  
672 USA) was used. Imaging was performed in tapping mode in air, using silicon ARROW-NCR  
673 cantilevers (tip radius <10 nm; Nanoworld, Neuchâtel, Switzerland). The optical camera  
674 integrated into the AFM setup was used to identify regions of interest for imaging. Regions  
675 with a size of 2 x 2  $\mu$ m<sup>2</sup> were imaged with a resolution of 512 x 512 pixels. We recorded  
676 height channel images (Supplementary Figure 8) and amplitude channel images (Figure 4A-  
677 C). Imaging of all genotypes was performed in biological duplicate; that is, the same  
678 experiments were repeated twice with two sets of plants grown independently at different  
679 times.

### 680 **Analysis of the cellulose microfibril images**

681 High-resolution, high-quality cell wall monolayers imaged in dry conditions were  
682 analyzed using custom made MATLAB script to determine the diameter of the imaged  
683 CMFs. For the analysis of CMF diameter, we used the height channel AFM images

684 (Supplementary Figure 8) as obtained from the AFM software. The extracted values of the  
685 CMF diameter were pooled for each genotype and CMF diameter values.

686

### 687 **Mechanical characterization of isolated cell walls using atomic force microscopy**

688 To determine the apparent elastic modulus of the isolated cell wall monolayers, we  
689 performed AFM-based nanoindentation (manual force mapping mode), applying a method  
690 previously described (Yakubov et al., 2016) and modified for our experimental conditions.  
691 Nanoindentation experiments were performed using a JPK Nanowizard 3 AFM (Bruker Nano  
692 GmbH, Berlin, Germany) mounted on an Olympus IX71 inverted phase-contrast microscope  
693 (Olympus Corporation, Shinjuku City, Tokyo, Japan). Coverslips with prepared samples  
694 were mounted onto the AFM sample holder as described in (Yakubov et al., 2016).

695 An optical CCD camera integrated into the AFM setup was used during the entire  
696 measurement; first to align the cantilever and then to perform constant checks of the sample  
697 and cantilever properties. We used DNP-10 cantilevers (cantilever A) with a nominal spring  
698 constant of  $0.35 \text{ N m}^{-1}$  (Bruker Corporation, Billerica, MA, USA). The optical sensitivity of the  
699 cantilevers was determined from contactless oscillations after which the thermal noise  
700 method was used to obtain the spring constant. The used cantilevers had spring constants  
701 ranging from  $0.30\text{-}0.38 \text{ N m}^{-1}$ .

702 Before starting the mechanical characterization, topological imaging of the cell wall  
703 monolayer was performed to identify the thinnest regions of the sample. First, using  
704 intermittent contact mode, we imaged an area of  $5 \times 5 \mu\text{m}^2$  with a resolution of  $512 \times 512$   
705 pixels. Imaging of a  $5 \times 5 \mu\text{m}^2$  region was always performed near the edge of the dissected  
706 cotyledon, so that part of imaged area represented the bare glass slide to which the  
707 cotyledon was attached. The flat glass slide surface, which contained some tissue debris  
708 after dissection, was used as a reference (position  $0 \text{ nm}$ ), to determine the thickness of the  
709 imaged sample (Supplementary Figure 7). If sample thickness was in the  $0.5\text{-}2.0 \mu\text{m}$  range,  
710 we selected a smaller  $1 \times 1 \mu\text{m}^2$  region within the original  $5 \times 5 \mu\text{m}$  area and repeated the  
711 topography imaging to re-confirm cell wall thickness (Supplementary Figure 7). If the  
712 thickness of the topological features inside this region remained in the  $0.5\text{-}2 \mu\text{m}$  range, we  
713 performed nanoindentation on that region. This range of sample thicknesses values was  
714 empirically chosen. During method development, we determined that regions thicker than  
715  $2.0 \mu\text{m}$  were either wrinkled cell wall patches or cell wall bilayers (i.e. from both adaxial and  
716 abaxial sides; thickness  $2.5\text{-}4 \mu\text{m}$ ). Samples thinner than  $0.5 \mu\text{m}$  were not used to avoid  
717 non-specific surface interactions and to minimize the contribution of the underlying glass  
718 surface to the elastic modulus.

719 For nanoindentation, the  $1 \times 1 \mu\text{m}^2$  region of interest was further divided into a  $16 \times$   
720  $16$  array. Each position was indented once to obtain a force map consisting of 256 force-  
721 displacement curves. For each approach-retract cycle, the contact force was set to 2.5 nN  
722 and the z-piezo speed was  $1 \mu\text{m s}^{-1}$ . The average indentation depth was 180 nm for Col-0,  
723 164 nm for *OE CALPAIN* and 147 nm for *dek1-4*, while indentation depth values were  
724 mostly in the range of 100-350 nm (Supplementary Figure 9G). While the indentation depths  
725 partially exceeded 10% of the sample thickness, the values lie in a similar range.  
726 Contributions from the underlying glass surface can thus be expected to be similar for all  
727 three samples.

728 One force map was obtained from each dissected cotyledon. Imaging of all  
729 genotypes was performed in biological duplicate; the same experiments were repeated two  
730 times, with two sets of plants grown independently at different times. From each replicate,  
731 cotyledons from 4-6 different plants were imaged, one cotyledon per plant. Force maps were  
732 analyzed using JPK SPM processing software, version 6.1.9 (Bruker Nano GmbH). As  
733 adhesion was observed in the retract segments of the force-displacement curves, the  
734 approach segments were fit with the Hertz model to obtain the apparent elastic modulus.  
735 The Poisson ratio was set to 0.5 and the baseline value was unpinned and set to 0. The  
736 extracted apparent elastic moduli from different cotyledons for the same genotype were  
737 pooled and *dek1-4* and *OE CALPAIN* values were compared with Col-0.

738

### 739 **Cell wall integrity assays**

740 Plants used for the Isoxaben treatments were sterilized and grown for 6 days on MS  
741 media containing 1% sucrose (as described in Section 2.3), with the addition of 2 nM  
742 Isoxaben (Sigma-Aldrich, St. Louis, MO, USA) dissolved in DMSO (Honeywell, Charlotte,  
743 NC, USA), and on MS 1% sucrose containing media supplemented with DMSO as a control.  
744 Experiments were performed in biological duplicates and technical triplicates. Salt stress  
745 experiments were performed as described in (Feng et al., 2018). Plants for osmotic  
746 treatments were grown for 6 days on MS 1% sucrose media supplemented with 200 mM  
747 mannitol or control plates. Each line and treatment were grown in biological duplicate and  
748 technical triplicate. Ectopic lignification experiments were performed as described in  
749 (Chaudhary et al., 2020).

750 Plants were imaged using a Keyence VHX-6000 digital microscope (Keyence  
751 Corporation of America, Itasca, IL, USA). Whole plates were placed on a motorized  
752 microscope stage and series of images were acquired in sequence covering the entire  
753 surface of the plate, and then automatically stitched by the software to generate a single  
754 whole-plate image. We used objective ZS20, 20X magnification, on black field, with epi-

755 illumination, for imaging 6-day Isoxaben grown plants, and NaCl and mannitol treated plants.  
756 For plants grown overnight on Isoxaben for lignin staining, we used ZS20 objective, 200X  
757 magnification, on white field without epi-illumination. Root and hypocotyl lengths were  
758 quantified using Measure length function of ImageJ software (Rasband, W., NIH, Bethesda,  
759 MD, USA).

760

## 761 **Statistical analysis**

762

763 Unless stated otherwise, all statistical analysis in this study, except the data from cell  
764 wall integrity assays, were performed using unpaired Student t-test, results were treated  
765 statistically significant if  $p < 0.05$ . We used online Student t-test calculator at the webpage  
766 <https://www.graphpad.com/quickcalcs/ttest1.cfm>.

767 Analysis of data from cell wall integrity assays - Isoxaben, NaCl, Mannitol growth  
768 assays and lignin staining was performed using estimation statistics. After obtaining root  
769 length data and quantifying signal intensity of lignin staining using ImageJ, statistical  
770 significance of the results was assessed using the online, open-access Estimation Stats  
771 software (<https://www.estimationstats.com/#/>) and data are plotted using Cumming  
772 estimation plot as described in (Ho et al., 2019).

773

## 774 **CONFLICT OF INTEREST**

775

776 Authors have no conflicts of interest to declare.

777

## 778 **AUTHOR CONTRIBUTIONS**

779

780 LN performed CSC imaging, AFM measurements and imaging and CWI sensing  
781 experiments, and analysed all the data from these experiments. KLJ, TB and AS  
782 conceptualized and designed the research. LN, GEY, KLJ and KGB conceptualized,  
783 developed, and validated cell wall isolation method and AFM imaging and force  
784 spectroscopy protocols. YM performed immunofluorescences and immunohistochemical  
785 imaging experiments and analysed the data. GEY wrote the MATLAB script for analysis of  
786 AFM cellulose images and made *DEK1* crosses with CSC reporter line. AS crossed *DEK1*  
787 modulated lines into CSC reporter line. LN wrote the original draft of the article manuscript.  
788 KLJ, TB, KGB and AS edited, curated and corrected the original draft of the manuscript. KB,  
789 GEY, and YM gave valuable input and comments on the article manuscript.

790

791 **ACKNOWLEDGMENTS**

792

793 LN was funded by University of Melbourne Research Scholarship, Max Planck Society,  
794 Norma Hilda Schuster neé Swift Scholarship and Albert Shimmins Postgraduate Writing-up  
795 Award. YM acknowledges the support of a University of Melbourne Research Scholarship.  
796 KLJ and AB would like to acknowledge the support of funds from the ARC Centre of  
797 Excellence in Plant Cell Walls (CE1101007) and start-up funds from La Trobe University.  
798 Authors would like to thank and acknowledge Mr Pengfei (Alfie) Hao of La Trobe University,  
799 Australia, for performing cell wall composition and data analysis and the La Trobe  
800 Biolmaging facility for assistance with electron microscopy. Authors would like to  
801 acknowledge A/Prof Monika S Doblin of La Trobe University, Australia for critical discussion  
802 and advice on method development and data interpretation. Finally, authors would like to  
803 acknowledge Ms. Reinhild Dünnebacke and Ms. Irina Berndt of the Max Planck Institute of  
804 Colloids and Interfaces, Germany, for their invaluable support and assistance during the  
805 AFM imaging and mechanical characterization of the isolated cell walls.

806

807

808 **FIGURES**

809

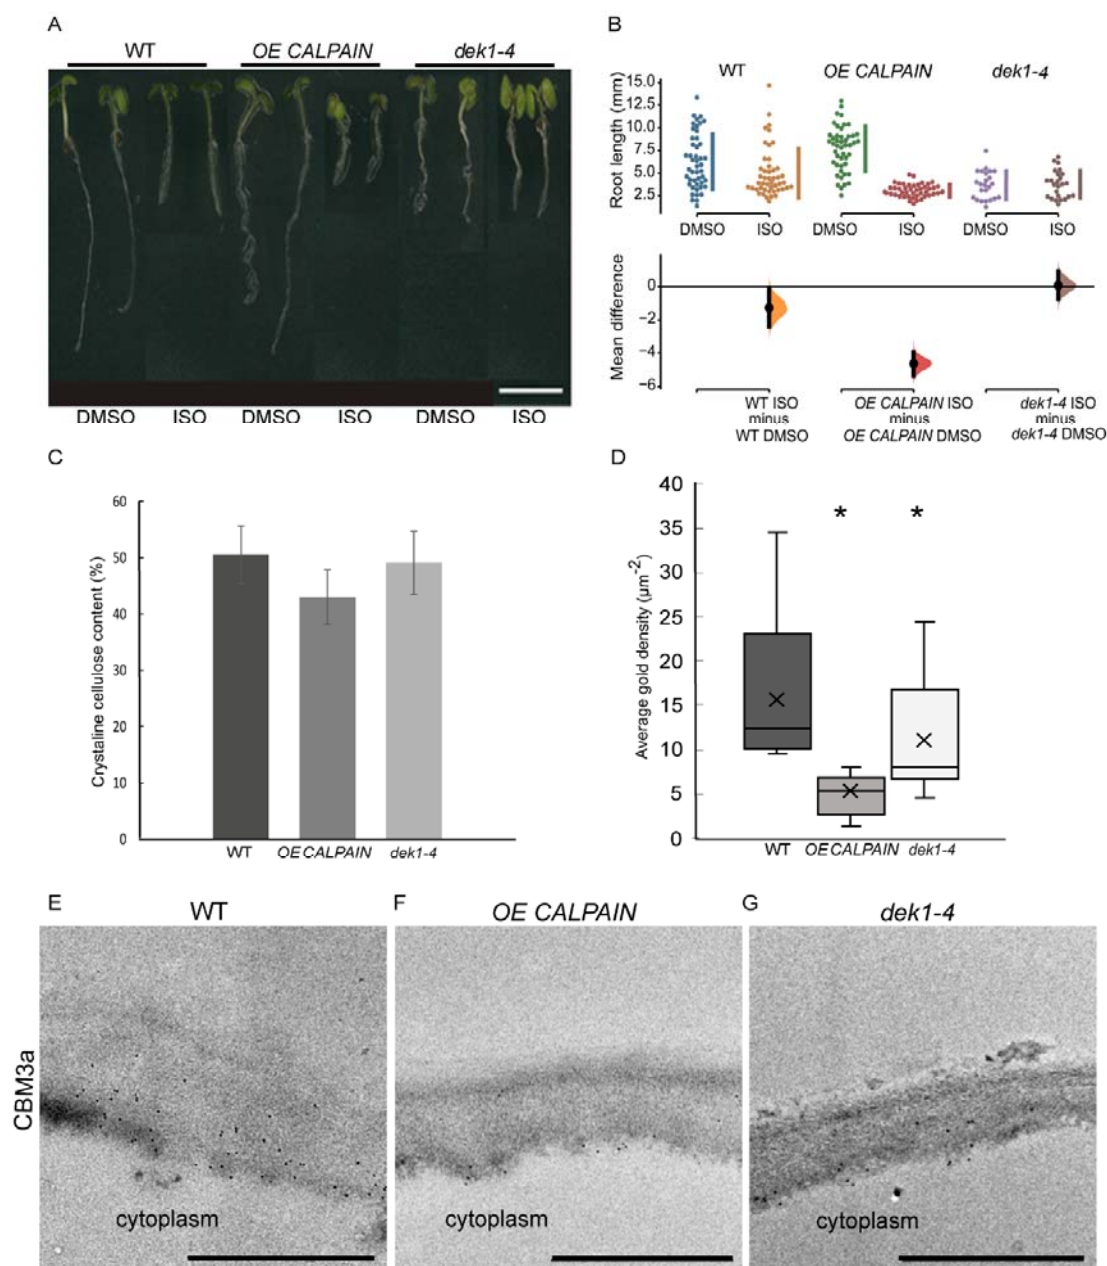

810

811

812 **Figure 1. Isoxaben treatment and cell wall analysis of WT and *DEK1* modulated**  
 813 ***Arabidopsis* lines. (A)** Representative images of 6-day old WT, *OE CALPAIN* and *dek1-4*  
 814 seedlings grown on media with either DMSO (control) or 2 nM Isoxaben, scale bar = 5 mm.  
 815 **(B)** Multiple two-group estimation analysis of root length for each genotype between plants  
 816 grown on media with DMSO and Isoxaben. The mean differences are shown in the  
 817 Cumming estimation plot (lower panel). The raw data are plotted on the upper axes; each



818 mean difference is plotted on the lower axes as a bootstrap sampling distribution. Mean  
819 differences are depicted as dots; 95% confidence intervals are indicated by the ends of the  
820 vertical error bars. N=47 WT DMSO, WT ISO, *OE CALPAIN* DMSO, 50 *OE CALPAIN* ISO,  
821 24 *dek1-4* DMSO, 25 *dek1-4* ISO **(C)** Crystalline cellulose contents of AIR cell wall  
822 preparations of 10-day old seedlings. Analysis performed on two biological replicates and  
823 two technical replicates. Error bars are representing standard error. No statistical  
824 significance observed  $p>0.05$ , Student t-test. **(D)** Average gold particle density for CBM3a  
825 labelled cellulose. Asterix represents statistical significance,  $p<0.0001$  for *OE CALPAIN*,  
826  $p<0.05$  for *dek1-4*, unpaired Student t-test. n=36 WT, 25 *OE CALPAIN* and 16 *dek1-4*  
827 epidermal cell walls. Analysis performed on biological duplicates. **(E-G)** Transmission  
828 electron micrographs of outer epidermal cell walls of 10-day old cotyledons showing  
829 immunogold labelled CBM3a cellulose binding. Scale bars = 500 nm.  
830

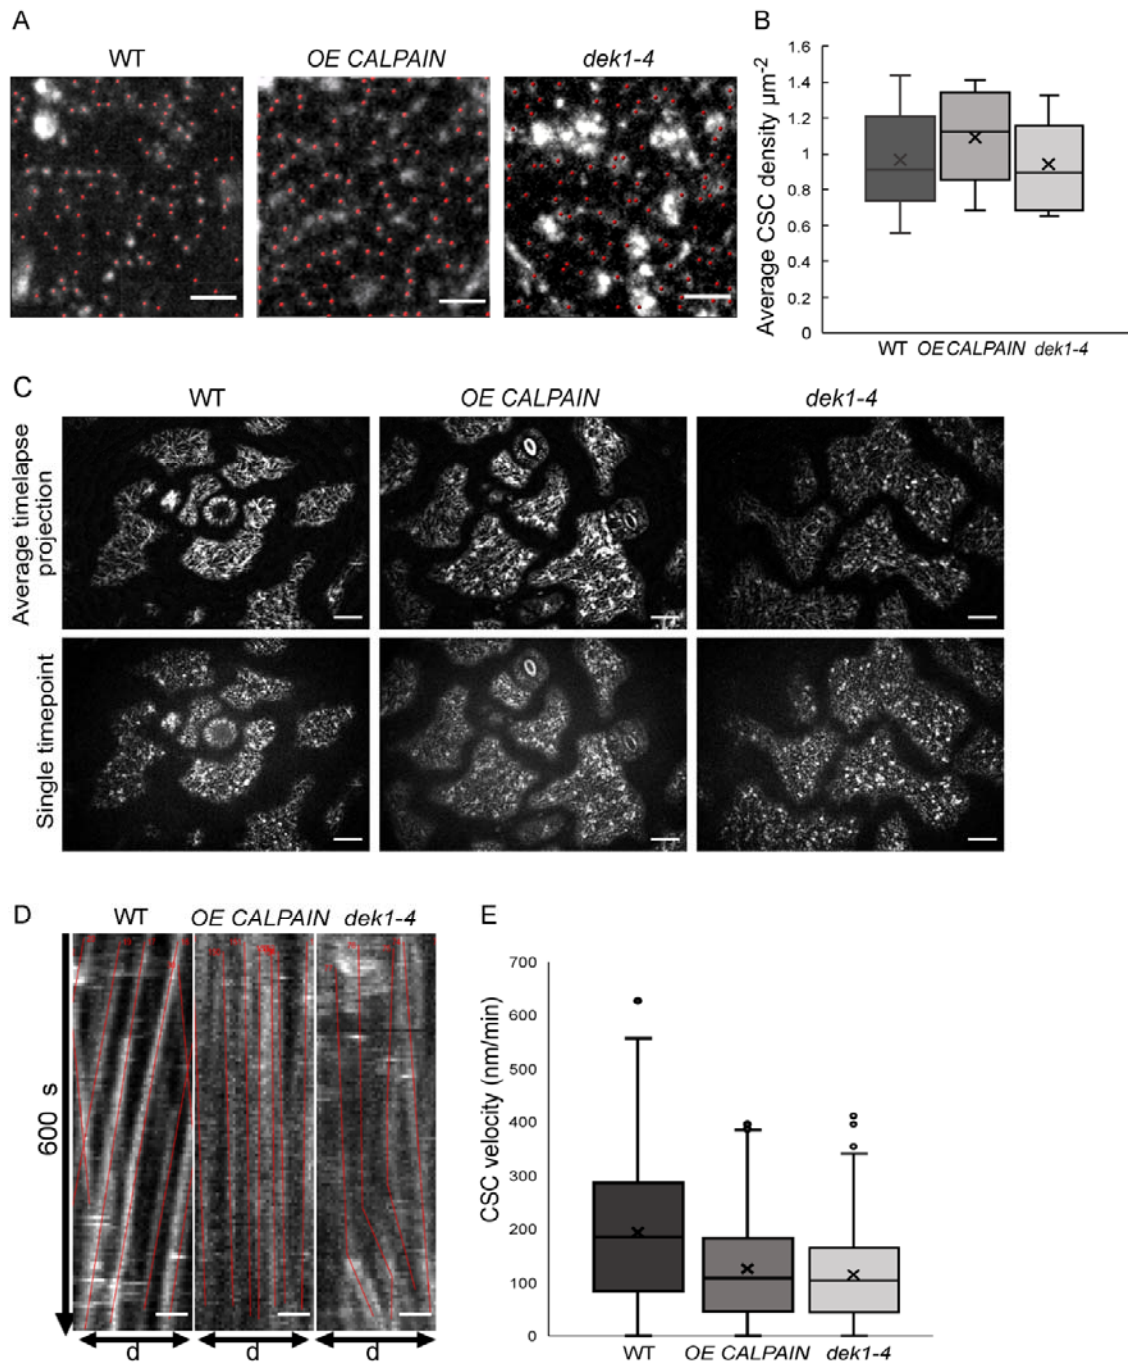

831

832 **Figure 2. Analysis of cellulose synthase complex (CSC) migration at the plasma**  
833 **membrane in WT and DEK1 modulated *Arabidopsis* lines. (A)** Representative  
834 micrographs of 3-day old *Arabidopsis* cotyledon epidermal pavement cells' membrane  
835 patches expressing GFP-CESA3 fluorescent marker used for CSC (red dots) density  
836 calculation in Col-0 and *DEK1* modulated lines. Scale bars = 2  $\mu\text{m}$ . **(B)** Box plots showing  
837 average density of CESA particles in 3-day old cotyledon pavement cells. n = 6 plants for  
838 WT, 31 cells; 6 plants for *OE CALPAIN*, 33 cells; 6 plants for *dek1-4*, 27 cells. No statistical

839 significance observed between WT and *DEK1* modulated lines,  $p=0.5647$  for *OE CALPAIN*,  
 840  $p=0.2705$  for *dek1-4*. (C) Representative images of 3-day old cotyledon epidermal pavement  
 841 cells used for generation of kymographs. Upper panel represents average projections of time  
 842 lapses, bottom panel represents a single frame of a corresponding time lapse,  $n=6$  plants  
 843 per genotype. Scale bars = 10  $\mu\text{m}$ . (D) Representative kymographs showing migration of  
 844 CESA complexes in 3-day old cotyledon pavement cells of Col-0 and *DEK1* modulated lines.  
 845 Red lines represent trajectories of individual CESA particles. WT,  $n=6$  plants, 937 CSC  
 846 particles tracked; *OE CALPAIN*,  $n=6$  plants, 982 CSC particles tracked; *dek1-4*,  $n=6$  plants,  
 847 692 CSC particles tracked. Analysis performed on biological duplicates. Scale bars = 10  $\mu\text{m}$ .  
 848 (E) Box plots represent distribution of CESA velocities, obtained from kymographs. Asterisk  
 849 represent statistical significance ( $p<0.0001$ , Student t-test).  
 850

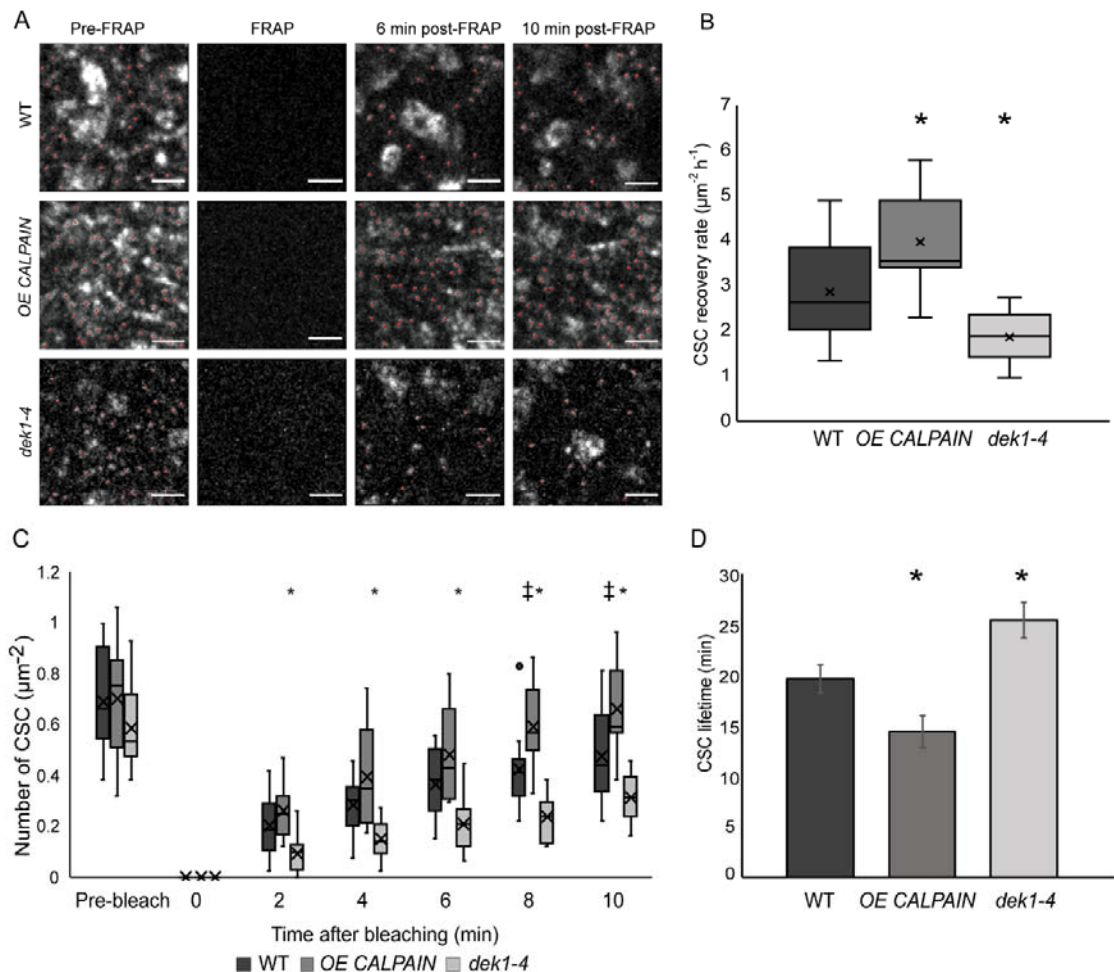

851

852 **Figure 3. Delivery and resident time of CESAs at the plasma membrane of WT and**  
 853 ***DEK1* modulated lines in *Arabidopsis* using fluorescent-recovery after photo-**  
 854 **bleaching (FRAP). (A) Representative images showing delivery of new CESA complexes**

855 (red dots) after photo-bleaching in 3-day old cotyledon pavement cells of WT, *OE CALPAIN*,  
856 *dek1-4*. Scale bars = 2  $\mu$ m. **(B)** Box plots showing average recovery rate of CESA particles  
857 following FRAP in cotyledon pavement cells. Asterisk represent statistical significance  
858 ( $p < 0.0188$  for *OE CALPAIN*,  $p < 0.0033$  for *dek1-4*, Student's t-test). **(C)** Box plots  
859 representing recovery of CESA particles after photo-bleaching at each time-point. Symbols  
860 above box plots represent statistical significance ( $p = 0.0102$  and  $0.0188$  for *OE CALPAIN*,  
861  $p = 0.0001$ - $0.0055$  for *dek1-4*, Student's t-test). **(D)** Histogram representing average lifetime of  
862 CESA complexes at the PM. Asterisk above boxplot represents statistical significance  
863 ( $p < 0.05$ , Student's t-test), error bars represent standard error. **(B-D)** Analysis was performed  
864 in two biological replicates for WT and *dek1-4*, and one replicate for *OE CALPAIN*.  $n = 7$   
865 cotyledons for WT, 3 cotyledons for *OE CALPAIN*, 6 cotyledons for *dek1-4*;  $n = 16$  cells for  
866 WT, 9 cells for *OE CALPAIN*, 14 cells for *dek1-4*.  
867

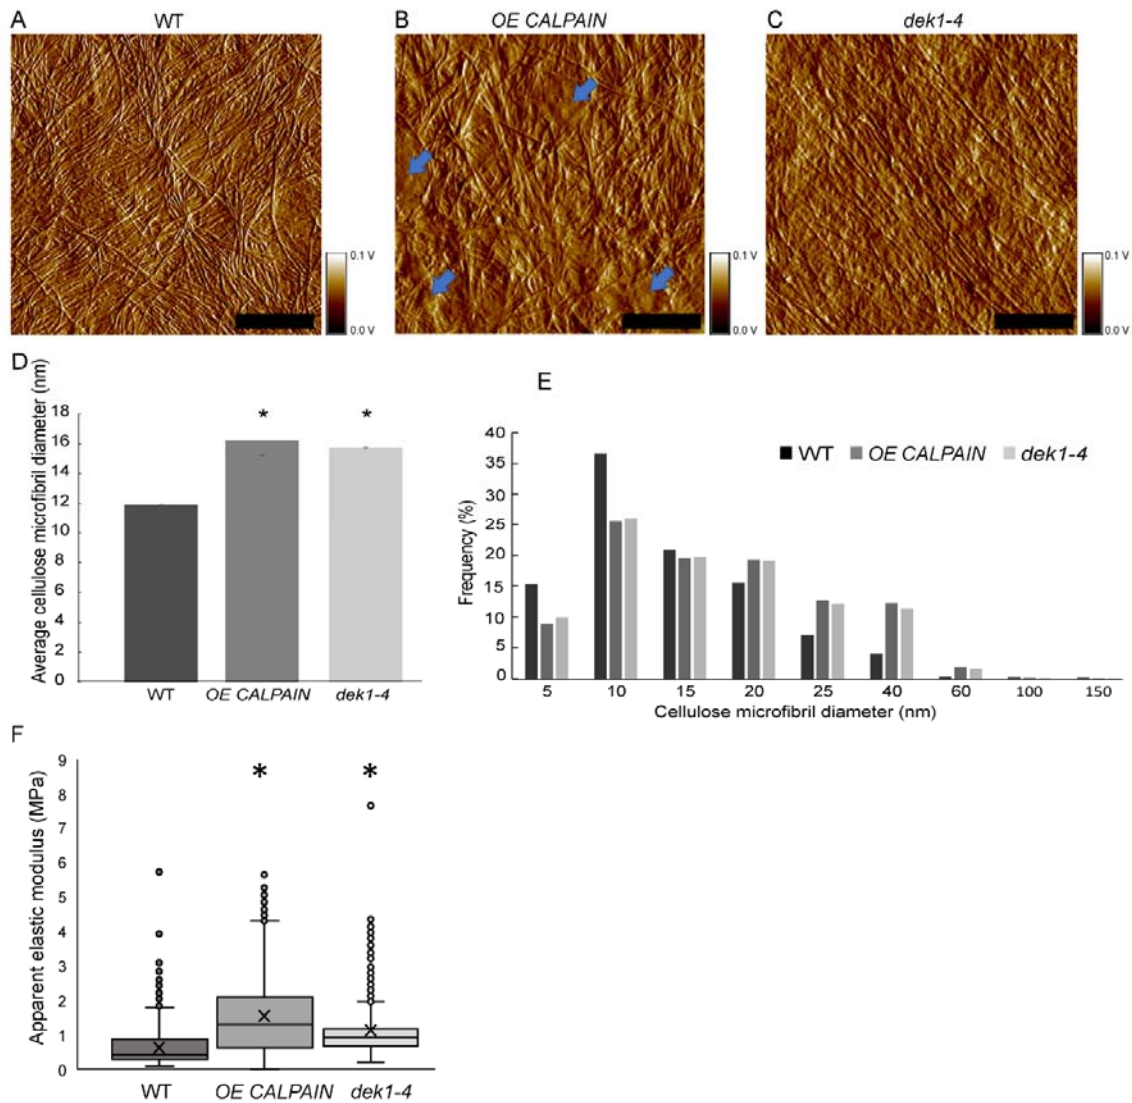

868

869 **Figure 4. AFM imaging and nanomechanical characterization of outer periclinal**

870 **cell walls. (A-C)** AFM amplitude channel images of the inner face (juxtaposed to the PM) of

871 periclinal primary cell walls in abaxial cotyledon pavement cells of 10-day old seedlings of

872 WT, *OE CALPAIN* and *dek1-4*. Samples were imaged using tapping mode in air. Arrows

873 indicate amorphous cell wall regions. Scale bars = 250 nm. Corresponding height channel

874 AFM images are shown in Supplementary Figure 8. **(D)** Histograms representing average

875 thickness of cellulose microfibrils in cotyledon epidermal cell walls. Asterisk represents

876 statistical significance,  $p < 0.0001$ , unpaired Student t-test.  $n = 5$  cotyledons, 10 cells, 1-2

877 regions per cell for WT;  $n = 6$  plants, 6 cells, 1-2 regions per cell for *OE CALPAIN*;  $n = 4$

878 cotyledons, 7 cells, 1-3 regions per cell for *dek1-4*. **(E)** Distribution of CMF thickness and

879 frequency in WT, *OE CALPAIN* and *dek1-4*. **(F)** Box plots representing distribution of cell

880 wall apparent elastic moduli generated after nanoindentation of extracted cotyledon  
 881 epidermal cell walls in a direction perpendicular to CMFs of 10-day old cotyledons of WT,  
 882 *OE CALPAIN* and *dek1-4*. n=12 indented cotyledons from 12 different plants for WT (1427  
 883 indentation points), 9 cotyledons from 9 different plants for *OE CALPAIN* (1553 indentation  
 884 points), and 12 cotyledons from 12 different plants for *dek1-4* (1509 indentation points). One  
 885 cell per one cotyledon was indented in all genotypes. Asterisk represents statistical  
 886 significance,  $p < 0.0001$ , Student t-test. (A-F) All experiments were performed in two  
 887 biological replicates.

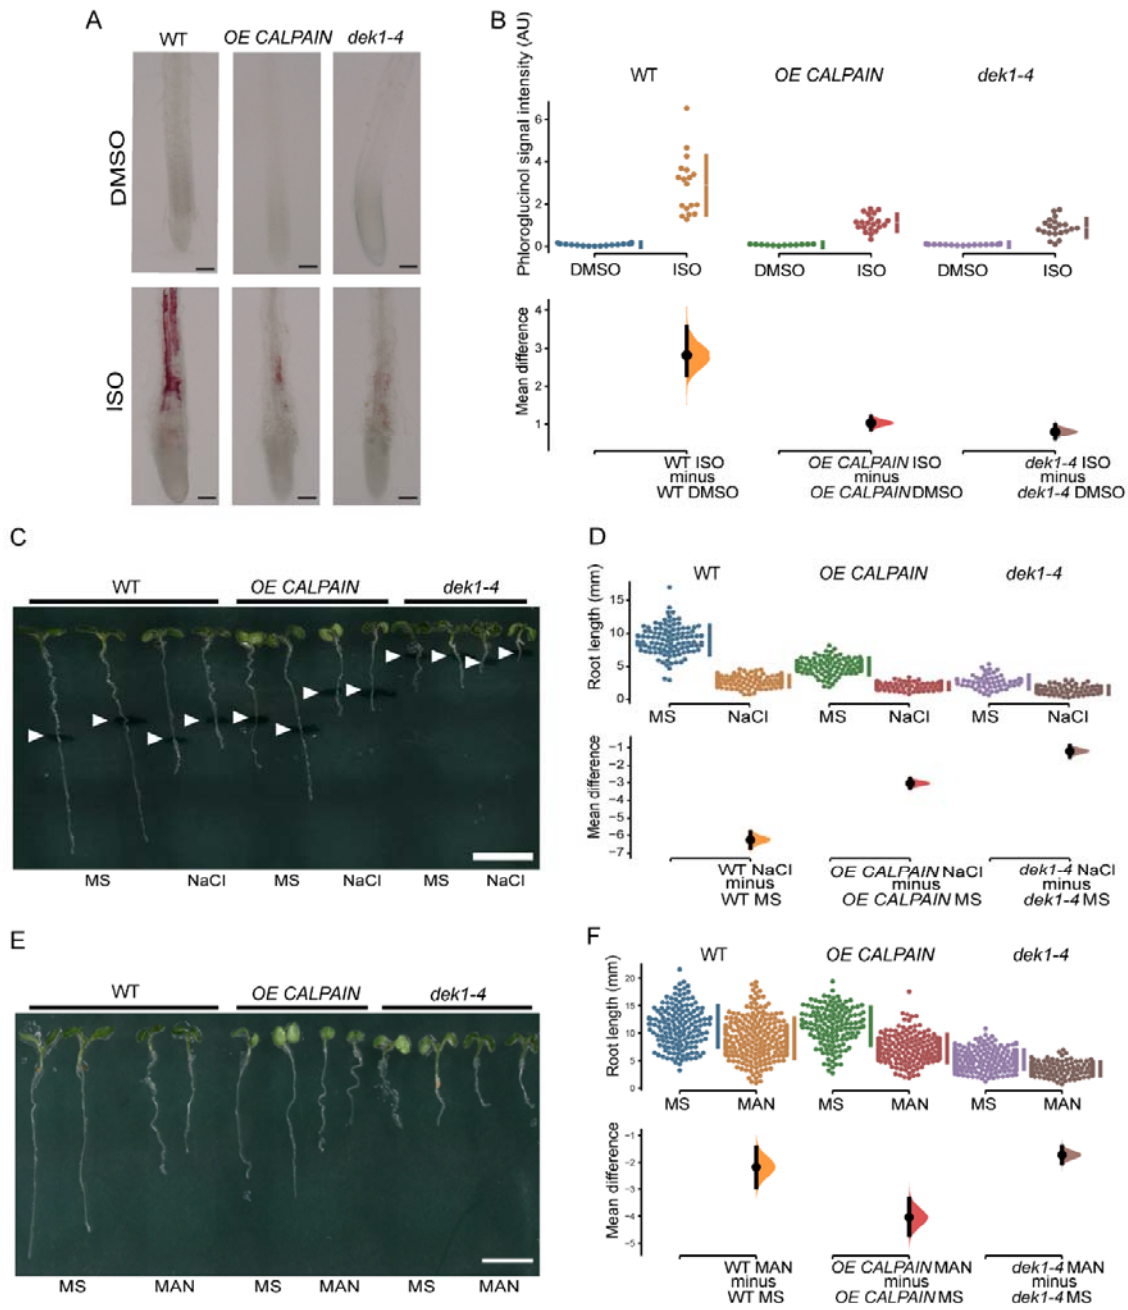

888

889

890 **Figure 5. Response of WT and *DEK1* modulated *Arabidopsis* lines to cellulose**  
891 **perturbation, salt and osmotic stress. (A)** Phloroglucinol staining of Isoxaben-induced  
892 ectopic lignin deposition in elongation region near root tips of 6-day old WT, *OE CALPAIN*  
893 and *dek1-4* seedlings grown in media with either DMSO (control) or 600 nM Isoxaben (ISO).  
894 Scale bars = 100  $\mu$ m. **(B)** Mean difference for arbitrary intensity values of phloroglucinol  
895 signal from roots in **(A)** are shown in the Cumming estimation plot. N = 16 WT DMSO, 18  
896 WT ISO, 12 *OE CALPAIN* DMSO, 21 *OE CALPAIN* ISO, 18 *dek1-4* DMSO, 21 *dek1-4* ISO  
897 **(C)** Representative images of 7-day old WT, *OE CALPAIN* and *dek1-4* seedlings transferred  
898 for 48 h on media supplemented with or without 140 mM NaCl. White arrowheads indicate  
899 length of roots at transfer. Scale bar = 5 mm. **(D)**. Mean difference for root length for each  
900 genotype between plants grown on control media and plants grown on NaCl supplemented  
901 media. N = 107 WT MS, 108 WT NaCl, 95 *OE CALPAIN* MS, 97 *OE CALPAIN* NaCl, 53  
902 *dek1-4* MS, 76 *dek1-4* NaCl. **(E)** Representative image of light-grown 6-day old WT, *OE*  
903 *CALPAIN* and *dek1-4* seedlings grown on control media (MS) or media supplemented with  
904 200 mM mannitol (MAN). Scale bar = 5 mm. **(F)** Mean difference for root length for each  
905 genotype between plants grown on MS media or media with mannitol. N = 152 WT MS, 230  
906 WT MAN, 140 *OE CALPAIN* MS, 181 *OE CALPAIN* MAN, 235 *dek1-4* MS, 133 *dek1-4* MAN.  
907 **(B,D,F)** Mean difference for lignin staining intensity and root length under different  
908 experimental conditions are shown in the Cumming estimation plot. The raw data are plotted  
909 on the upper axes; each mean difference is plotted on the lower axes as a bootstrap  
910 sampling distribution. Mean differences are depicted as dots on the lower panels of  
911 Cumming plots; 95% confidence intervals are indicated by the ends of the vertical error bars.  
912

913

## 914 REFERENCES

915

- 916 **Amanda D, Doblin MS, Galletti R, Bacic A, Ingram GC, L. JK** (2016) DEFECTIVE KERNEL1 (DEK1)  
917 regulates cell walls in the leaf epidermis. *Plant Physiology* **172**: 2204-2218
- 918 **Amanda D, Doblin MS, MacMillan CP, Galletti R, Golz JF, Bacic A, Ingram GC, Johnson KL** (2017)  
919 *Arabidopsis* DEFECTIVE KERNEL1 regulates cell wall composition and axial growth in the  
920 inflorescence stem. *Plant Direct* **1**: e00027
- 921 **Basu D, Tian L, Debrosse T, Poirier E, Emch K, Herock H, Travers A, Showalter AM** (2016)  
922 Glycosylation of a Fasciclin-Like Arabinogalactan-Protein (SOS5) Mediates Root Growth and  
923 Seed Mucilage Adherence via a Cell Wall Receptor-Like Kinase (FEI1/FEI2) Pathway in  
924 *Arabidopsis*. *PLoS one* **11**: e0145092-e0145092
- 925 **Becraft PW, Li K, Dey N, Asuncion-Crabb Y** (2002) The maize *dek1* gene functions in embryonic  
926 pattern formation and cell fate specification. *Development* **129**: 5217-5225

- 927 **Bischoff V, Desprez T, Mouille G, Vernhettes S, Gonneau M, Höfte H** (2011) Phytochrome regulation  
928 of cellulose synthesis in Arabidopsis. *Current Biology* **21**: 1822-1827
- 929 **Blackburn MR, Haruta M, Moura DS** (2020) Twenty Years of Progress in Physiological and  
930 Biochemical Investigation of RALF Peptides1 *Plant Physiology* **182**: 1657-1666
- 931 **Blake AW, McCartney L, Flint JE, Bolam DN, Boraston AB, Gilbert HJ, Knox JP** (2006) Understanding  
932 the biological rationale for the diversity of cellulose-directed carbohydrate-binding modules  
933 in prokaryotic enzymes. *Journal of Biological Chemistry* **281**: 29321-29329
- 934 **Bouton S, Leboeuf E, Mouille G, Leydecker MT, Talbotec J, Granier F, Lahaye M, Höfte H, Truong  
935 HN** (2002) QUASIMODO1 encodes a putative membrane-bound glycosyltransferase required  
936 for normal pectin synthesis and cell adhesion in Arabidopsis. *The Plant Cell* **14**: 2577-2590
- 937 **Bringmann M, Li E, Sampathkumar A, Kocabek T, Hauser M-T, Persson S** (2012) POM-  
938 POM2/CELLULOSE SYNTHASE INTERACTING1 Is Essential for the Functional Association of  
939 Cellulose Synthase and Microtubules in Arabidopsis. *The Plant Cell* **24**: 163-177
- 940 **Chaudhary A, Chen X, Gao J, Leśniewska B, Hammerl R, Dawid C, Schneitz K** (2020) The Arabidopsis  
941 receptor kinase STRUBBELIG regulates the response to cellulose deficiency. *PLOS Genetics*  
942 **16**
- 943 **Cosgrove DJ** (2005) Growth of the plant cell wall. *Nature Reviews Molecular Cell Biology* **6**: 850-861
- 944 **Czechowski T, Stitt M, Altmann T, Udvardi MK, Scheible W-R** (2005) Genome-Wide Identification  
945 and Testing of Superior Reference Genes for Transcript Normalization in Arabidopsis. *Plant*  
946 *Physiology* **139**: 5-7
- 947 **Demko V, Perroud P-F, Johansen W, Delwiche CF, Cooper ED, Remme P, Ako AE, Kugler KG, Mayer  
948 KFX, Quatrano R, Olsen O-A** (2014) Genetic Analysis of DEFECTIVE KERNEL1 Loop Function in  
949 Three-Dimensional Body Patterning in *Physcomitrella patens*. *Plant Physiology* **166**:  
950 903-919
- 951 **Denness L, McKenna JF, Segonzac C, Wormit A, Madhou P, Bennett M, Mansfield J, Zipfel C,  
952 Hamann T** (2011) Cell Wall Damage-Induced Lignin Biosynthesis Is Regulated by a Reactive  
953 Oxygen Species- and Jasmonic Acid-Dependent Process in Arabidopsis *Plant Physiology*  
954 **156**: 1364-1374
- 955 **Desprez T, Juraniec M, Crowell EF, Jouy H, Pochylova Z, Parcy F, Höfte H, Gonneau M, Vernhettes S**  
956 (2007) Organization of cellulose synthase complexes involved in primary cell wall synthesis  
957 in Arabidopsis thaliana. *Proceedings of the National Academy of Sciences of the United*  
958 *States of America* **104**: 15572-15577
- 959 **Diotallevi F, Mulder B** (2007) The cellulose synthase complex: a polymerization driven  
960 supramolecular motor. *Biophysical Journal* **92**: 2666-2673
- 961 **Du J, Kirui A, Huang S, Wang L, Barnes WJ, Kiemle SN, Zheng Y, Rui Y, Ruan M, Qi S, Kim SH, Wang  
962 T, Cosgrove DJ, Anderson CT, Xiao C** (2020) Mutations in the Pectin Methyltransferase  
963 QUASIMODO2 Influence Cellulose Biosynthesis and Wall Integrity in Arabidopsis. *The Plant*  
964 *Cell* **32**: 3576-3597
- 965 **Edwards K, Johnstone C, Thompson C** (1991) A simple and rapid method for the preparation of plant  
966 genomic DNA for PCR analysis. *Nucleic Acids Research* **19**: 1349
- 967 **Engelsdorf T, Hamann T** (2014) An update on receptor-like kinase involvement in the maintenance  
968 of plant cell wall integrity. *Annals of Botany* **114**: 1339-1347
- 969 **Fagard M, Desnos T, Desprez T, Goubet F, Refregier G, Mouille G, McCann M, Rayon C, Vernhettes  
970 S, Höfte H** (2000) PROCUSTE1 encodes a cellulose synthase required for normal cell  
971 elongation specifically in roots and dark-grown hypocotyls of Arabidopsis. *The Plant Cell* **12**:  
972 2409-2424
- 973 **Feng W, Kita D, Peaucelle A, Cartwright HN, Doan V, Duan Q, Liu MC, Maman J, Steinhorst L,  
974 Schmitz-Thom I, Yvon R, Kudla J, Wu H-M, Cheung AY, Dinneny JR** (2018) The FERONIA  
975 receptor kinase maintains cell-wall integrity during salt stress through Ca signaling. *Current*  
976 *Biology* **28**: 1-10



- 977 **Fujita M, Himmelspach R, Hocart CH, Williamson RE, Mansfield SD, Wasteney GO** (2011) Cortical  
978 microtubules optimize cell-wall crystallinity to drive unidirectional growth in Arabidopsis.  
979 *The Plant Journal* **66**: 915-928
- 980 **Galletti R, Johnson KL, Scofield S, San-Bento R, Watt AM, Murray JAH, Ingram GC** (2015)  
981 DEFECTIVE KERNEL 1 promotes and maintains plant epidermal differentiation. *Development*  
982 **142**: 1978-1983
- 983 **Galletti R, Verger S, Hamant O, Ingram GC** (2016) Developing a 'thick skin': a paradoxical role for  
984 mechanical tension in maintaining epidermal integrity? *Development* **143**: 3249-3258
- 985 **García Díaz BE, Gauthier S, Davies PL** (2006) Ca<sup>2+</sup> Dependency of Calpain 3 (p94) Activation.  
986 *Biochemistry* **45**: 3714-3722
- 987 **Gjetting SK, Mahmood K, Shabala L, Kristensen A, Shabala S, Palmgren M, Fuglsang AT** (2020)  
988 Evidence for multiple receptors mediating RALF-triggered Ca<sup>2+</sup> signaling and proton pump  
989 inhibition. *The Plant Journal* **104**: 433-446
- 990 **Haas KT, Wightman R, Meyerowitz EM, Peaucelle A** (2020) Pectin homogalacturonan nanofilament  
991 expansion drives morphogenesis in plant epidermal cells. *Science* **367**: 1003-1007
- 992 **Hamann T** (2014) The Plant Cell Wall Integrity Maintenance Mechanism—Concepts for Organization  
993 and Mode of Action. *Plant and Cell Physiology* **56**: 215-223
- 994 **Hamant O, Heisler MG, Jönsson H, Krupinski P, Uyttewaal M, Bokov P, Corson F, Sahlin P,**  
995 **Boudaoud A, Meyerowitz EM, Couder Y, Traas J** (2008) Developmental patterning by  
996 mechanical signals in Arabidopsis. *Science* **322**: 1650-1655
- 997 **Heim DR, Skomp JR, Tschabold EE, Larrinua IM** (1990) Isoxaben Inhibits the Synthesis of Acid  
998 Insoluble Cell Wall Materials In Arabidopsis thaliana. *Plant Physiology* **93**: 695-700
- 999 **His I, Driouich A, Nicol F, Jauneau A, Höfte H** (2001) Altered pectin composition in primary cell walls  
1000 of korrigan, a dwarf mutant of Arabidopsis deficient in a membrane-bound endo-1,4-beta-  
1001 glucanase. *Planta* **212**: 348-358
- 1002 **Ho J, Tumkaya T, Aryal S, Choi H, Claridge-Chang A** (2019) Moving beyond P values: data analysis  
1003 with estimation graphics. *Nature Methods* **16**: 565-566
- 1004 **Hu H, Zhang R, Tang Y, Peng C, Wu L, Feng S, Chen P, Wang Y, Du X, Peng L** (2019) Cotton CSLD3  
1005 restores cell elongation and cell wall integrity mainly by enhancing primary cellulose  
1006 production in the Arabidopsis cesa6 mutant. *Plant Molecular Biology* **101**: 389-401
- 1007 **Johnson KL, Degnan KA, Ross Walker J, Ingram GC** (2005) AtDEK1 is essential for specification of  
1008 embryonic epidermal cell fate. *The Plant Journal* **44**: 114-127
- 1009 **Johnson KL, Faulkner C, Jeffree CE, Ingram GC** (2008) The phytocalpain defective kernel 1 is a novel  
1010 Arabidopsis growth regulator whose activity is regulated by proteolytic processing. *The Plant*  
1011 *Cell* **20**: 2619–2630
- 1012 **Johnson KL, Faulkner, C., Jeffree, C. E., Ingram, G. C.** (2008) The phytocalpain defective kernel 1 is a  
1013 novel Arabidopsis growth regulator whose activity is regulated by proteolytic processing.  
1014 *The Plant Cell* **20**: 2619–2630
- 1015 **Johnson KL, Gidley MJ, Bacic A, Doblin MS** (2018) Cell wall biomechanics: a tractable challenge in  
1016 manipulating plant cell walls 'fit for purpose'! *Current Opinion in Biotechnology* **49**: 163-171
- 1017 **Kafle K, Xi X, Lee CM, Tittmann BR, Cosgrove DJ, Park YB, Kim SH** (2014) Cellulose microfibril  
1018 orientation in onion (*Allium cepa* L.) epidermis studied by atomic force microscopy (AFM)  
1019 and vibrational sum frequency generation (SFG) spectroscopy. *Cellulose* **21**: 1075-1086
- 1020 **Knox JP, Linstead PJ, King J, Cooper C, Roberts K** (1990) Pectin esterification is spatially regulated  
1021 both within cell walls and between developing tissues of root apices. *Planta* **181**: 512-521
- 1022 **Kohorn BD, Johansen, S., Shishido, A., Todorova, T., Martinez, R., Defeo, E., Obregon, P.** (2009)  
1023 Pectin activation of MAP kinase and gene expression is WAK2 dependent. *The Plant Journal*  
1024 **60**: 974-982
- 1025 **Lane DR, Wiedemeier A, Peng L, Höfte H, Vernhettes S, Desprez T, Hocart CH, Birch RJ, Baskin TI,**  
1026 **Burn JE, Arioli T, Betzner AS, Williamson RE** (2001) Temperature-sensitive alleles of RSW2

- 1027 link the KORRIGAN endo-1,4-beta-glucanase to cellulose synthesis and cytokinesis in  
1028 Arabidopsis. *Plant Physiol* **126**: 278-288
- 1029 **Lid SE, Gruis D, Jung R, Lorentzen JA, Ananiev E, Chamberlin M, Niu X, Meeley R, Nichols S, Olsen**  
1030 **O-A** (2002) The defective kernel 1 (dek1) gene required for aleurone cell development in the  
1031 endosperm of maize grains encodes a membrane protein of the calpain gene superfamily.  
1032 *Proceedings of the National Academy of Sciences of the United States of America* **99**: 5460-  
1033 5465
- 1034 **Livak KJ, Schmittgen TD** (2001) Analysis of relative gene expression data using real-time quantitative  
1035 PCR and the  $2^{-\Delta\Delta Ct}$  Method. *Methods* **25**
- 1036 **Lopez-Sanchez P, Cersosimo J, Wang D, Flanagan B, Stokes JR, Gidley MJ** (2015) Poroelastic  
1037 Mechanical Effects of Hemicelluloses on Cellulosic Hydrogels under Compression. *PLOS one*  
1038 **10**: e0122132
- 1039 **Marcus SE, Verhertbruggen Y, Herve C, Ordaz-Ortiz JJ, Farkas V, Pedersen HL, Willats WG, Knox JP**  
1040 (2008) Pectic homogalacturonan masks abundant sets of xyloglucan epitopes in plant cell  
1041 walls. *BMC Plant Biology* **8**: 60
- 1042 **Mouille G, Ralet MC, Cavalier C, Eland C, Effroy D, Hématy K, McCartney L, Truong HN, Gaudon V,**  
1043 **Thibault JF, Marchant A, Höfte H** (2007) Homogalacturonan synthesis in Arabidopsis  
1044 thaliana requires a Golgi-localized protein with a putative methyltransferase domain. *The*  
1045 *Plant Journal* **50**: 605-614
- 1046 **Moulia B, Douady S, Hamant O** (2021) Fluctuations shape plants through proprioception. *Science*  
1047 **372**: eabc6868
- 1048 **Neff MM, Neff JD, Chory J, Pepper AE** (1998) dCAPS, a simple technique for the genetic analysis of  
1049 single nucleotide polymorphisms: experimental applications in Arabidopsis thaliana genetics.  
1050 *The Plant Journal* **14**: 387-392
- 1051 **Nixon BT, Mansouri K, Singh A, Du J, Davis JK, Lee J-G, Slabaugh E, Vandavasi VG, O'Neill H,**  
1052 **Roberts EM, Roberts AW, Yingling YG, Haigler CH** (2016) Comparative Structural and  
1053 Computational Analysis Supports Eighteen Cellulose Synthases in the Plant Cellulose  
1054 Synthesis Complex. *Scientific Reports* **6**: 28696
- 1055 **Ono Y, Sorimachi H** (2012) Calpains: an elaborate proteolytic system. *Biochim Biophys Acta* **1824**:  
1056 224-236
- 1057 **Paredez AR, Somerville CR, Ehrhardt DW** (2006) Visualization of cellulose synthase demonstrates  
1058 functional association with microtubules. *Science* **312**: 1491-1495
- 1059 **Persson Sea** (2007) Genetic evidence for three unique components in primary cell-wall cellulose  
1060 synthase complexes in Arabidopsis. *Proc. Natl. Acad. Sci. U.S.A.* **104**: 15566–15571
- 1061 **Pettolino FA, Walsh C, Fincher GB, Bacic A** (2012) Determining the polysaccharide composition of  
1062 plant cell walls. *Nat Protoc* **7**: 1590-1607
- 1063 **Polko JK, Kieber JJ** (2019) The Regulation of Cellulose Biosynthesis in Plants. *The Plant Cell* **31**: 282-  
1064 296
- 1065 **Roeder AHK, Cunha A, Ohno CK, Meyerowitz EM** (2012) Cell cycle regulates cell type in the  
1066 Arabidopsis sepal. *Development* **139**: 4416-4427
- 1067 **Ruhnnow F, Zwicker D, Diez S** (2011) Tracking single particles and elongated filaments with  
1068 nanometer precision. *Biophysical Journal* **100**: 2820-2828
- 1069 **Sampathkumar A, Gutierrez R, McFarlane HE, Bringmann M, Lindeboom J, Emons A-M, Samuels L,**  
1070 **Ketelaar T, Ehrhardt DW, Persson S** (2013) Patterning and Lifetime of Plasma Membrane-  
1071 Localized Cellulose Synthase Is Dependent on Actin Organization in Arabidopsis Interphase  
1072 Cells. *Plant Physiology* **162**: 675-688
- 1073 **Sánchez-Rodríguez C, Ketelaar K, Schneider R, Villalobos JA, Somerville CR, Persson S, Wallace IS**  
1074 (2017) BRASSINOSTEROID INSENSITIVE2 negatively regulates cellulose synthesis in  
1075 Arabidopsis by phosphorylating cellulose synthase 1. *Proc. Natl. Acad. Sci. U.S.A.* **114**: 3533–  
1076 3538

- 1077 **Shim I, Law R, Kileeg Z, Stronghill P, Northey JGB, Strap JL, Bonetta DT** (2018) Alleles Causing  
1078 Resistance to Isoxaben and Flupoxam Highlight the Significance of Transmembrane Domains  
1079 for CESA Protein Function. *Frontiers in Plant Science* **9**
- 1080 **Stegmann M, Monaghan J, Smakowska-Luzan E, Rovenich H, Lehner A, Holton N, Belkhadir Y,**  
1081 **Zipfel C** (2017) The receptor kinase FER is a RALF-regulated scaffold controlling plant  
1082 immune signaling. *Science* **355**: 287-289
- 1083 **Tenhaken R** (2014) Cell wall remodeling under abiotic stress. *Frontiers in Plant Science* **5**: 771
- 1084 **Tonami K, Kurihara Y, Arima S, Nishiyama K, Uchijima Y, Asano T, Sorimachi H, Kurihara H** (2011)  
1085 Calpain-6, a microtubule-stabilizing protein, regulates Rac1 activity and cell motility through  
1086 interaction with GEF-H1. *Journal of Cell Science* **124**: 1214-1223
- 1087 **Tran D, Galletti R, Neumann ED, Dubois A, Sharif-Naeini R, Geitmann A, Frachisse JM, Hamant O,**  
1088 **Ingram GC** (2017) A mechanosensitive Ca<sup>2+</sup> channel activity is dependent on the  
1089 developmental regulator DEK1. *Nature Communications* **8**
- 1090 **Updegraff DM** (1969) Semimicro determination of cellulose in biological materials. *Analytical*  
1091 *Biochemistry* **32**: 420-424
- 1092 **Vaahtera L, Schulz J, Hamann T** (2019) Cell wall integrity maintenance during plant development  
1093 and interaction with the environment. *Nature Plants* **5**: 924-932
- 1094 **Vain T, Crowell EF, Timpano H, Biot E, Desprez T, Mansoori N, Trindade LM, Pagant S, Robert S,**  
1095 **Höfte H, Gonneau M, Vernhettes S** (2014) The Cellulase KORRIGAN Is Part of the Cellulose  
1096 Synthase Complex. *Plant Physiology* **165**: 1521-1532
- 1097 **Verger S, Long Y, Boudaoud A, Hamant O** (2018) A tension-adhesion feedback loop in plant  
1098 epidermis. *eLife* **7**: e34460
- 1099 **Wang C, Barry JK, Min Z, Tordsen G, Rao AG, Olsen OA** (2003) The calpain domain of the maize  
1100 DEK1 protein contains the conserved catalytic triad and functions as a cysteine proteinase.  
1101 *Journal of Biological Chemistry* **278**: 34467-34474
- 1102 **Wang T, Park YB, Cosgrove DJ, Hong M** (2015) Cellulose-Pectin Spatial Contacts Are Inherent to  
1103 Never-Dried Arabidopsis Primary Cell Walls: Evidence from Solid-State Nuclear Magnetic  
1104 Resonance *Plant Physiology* **168**: 871-884
- 1105 **Wang X, Wilson L, Cosgrove DJ** (2020) Pectin methylesterase selectively softens the onion epidermal  
1106 wall yet reduces acid-induced creep. *Journal of Experimental Botany* **71**: 2629-2640
- 1107 **Wilson SM, Bacic A** (2012) Preparation of plant cells for transmission electron microscopy to  
1108 optimize immunogold labeling of carbohydrate and protein epitopes. *Nature Protocols* **7**:  
1109 1716-1727
- 1110 **Xiao C, Anderson CT** (2016) Interconnections between cell wall polymers, wall mechanics, and  
1111 cortical microtubules: Teasing out causes and consequences. *Plant signaling & behavior* **11**:  
1112 e1215396-e1215396
- 1113 **Xiao C, Zhang T, Zheng Y, Cosgrove DJ, Anderson CT** (2016) Xyloglucan Deficiency Disrupts  
1114 Microtubule Stability and Cellulose Biosynthesis in Arabidopsis, Altering Cell Growth and  
1115 Morphogenesis. *Plant Physiology* **170**: 234-249
- 1116 **Yakubov GE, Bonilla MR, Chen H, Doblin MS, Bacic A, Gidley MJ, Stokes JR** (2016) Mapping nano-  
1117 scale mechanical heterogeneity of primary plant cell walls. *Journal of Experimental Botany*  
1118 **67**: 2799-2816
- 1119 **Yang Y, Yu Y, Liang Y, Anderson CT, Cao J** (2018) A Profusion of Molecular Scissors for Pectins:  
1120 Classification, Expression, and Functions of Plant Polygalacturonases. *Frontiers in Plant*  
1121 *Science* **9**: 1208
- 1122 **Zhang T, Tang H, Vavylonis D, Cosgrove DJ** (2019) Disentangling loosening from softening: insights  
1123 into primary cell wall structure. *The Plant Journal* **100**: 1101-1117
- 1124 **Zhang T, Zheng Y, Cosgrove DJ** (2016) Spatial organization of cellulose microfibrils and matrix  
1125 polysaccharides in primary plant cell walls as imaged by multichannel atomic force  
1126 microscopy. *The Plant Journal* **85**: 179-192

- 1127 **Zhang X, Yang Z, Wu D, Yu F** (2020) RALF–FERONIA Signaling: Linking Plant Immune Response with  
1128 Cell Growth. *Plant Communications* **1**: 100084
- 1129 **Zhu X, Li S, Pan S, Xin X, Gu Y** (2018) CSI1, PATROL1, and exocyst complex cooperate in delivery of  
1130 cellulose synthase complexes to the plasma membrane. *Proceedings of the National*  
1131 *Academy of Sciences* **115**: E3578-E3587
- 1132
- 1133
- 1134

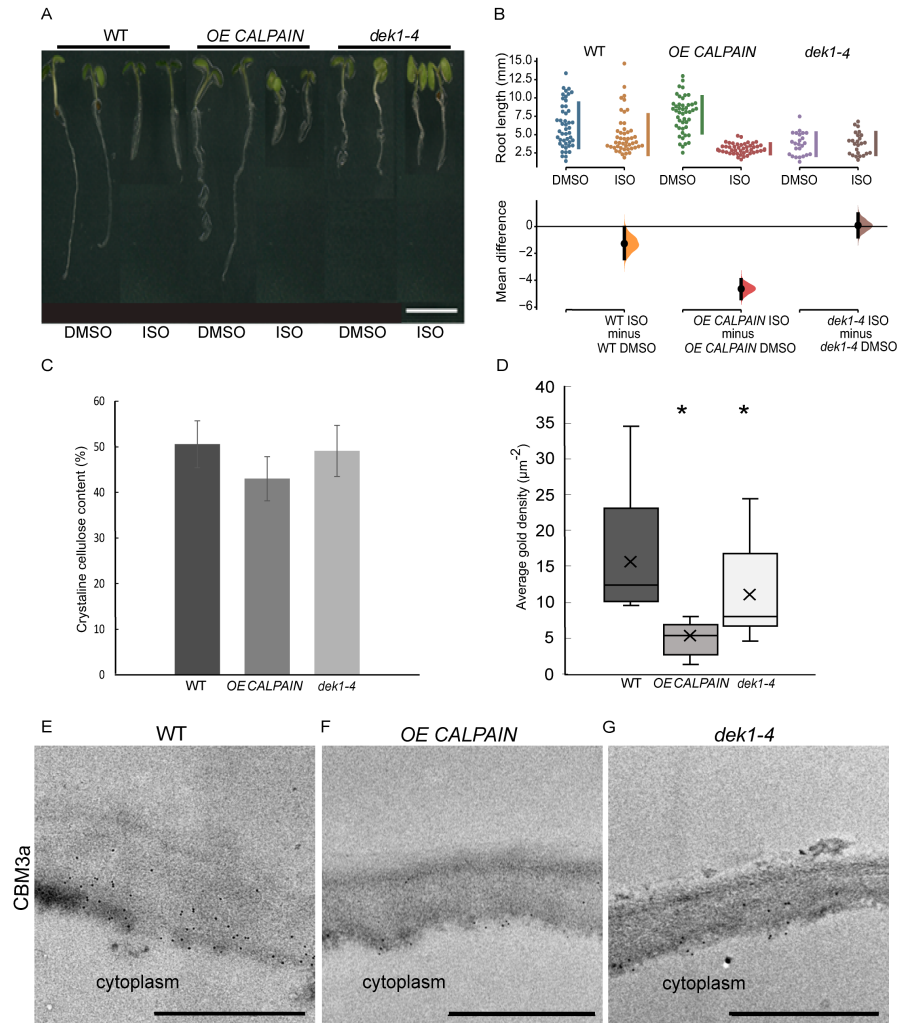

Figure 1. Isoxaben treatment and cell wall analysis of WT and DEK1 modulated Arabidopsis lines. (A) Representative images of 6-day old WT, OE CALPAIN and dek1-4 seedlings grown on media with either DMSO (control) or 2 nM Isoxaben, scale bar = 5 mm. (B) Multiple two-group estimation analysis of root length for each genotype between plants grown on media with DMSO and Isoxaben. The mean differences are shown in the Cumming estimation plot (lower panel). The raw data are plotted on the upper axes; each mean difference is plotted on the lower axes as a bootstrap sampling distribution. Mean differences are depicted as dots; 95% confidence intervals are indicated by the ends of the vertical error bars. N=47 WT DMSO, WT ISO, OE CALPAIN DMSO, 50 OE CALPAIN ISO, 24 dek1-4 DMSO, 25 dek1-4 ISO (C) Crystalline cellulose contents of AIR cell wall preparations of 10-day old seedlings. Analysis performed on two biological replicates and two technical replicates. Error bars are representing standard error. No statistical significance observed  $p > 0.05$ , Student t-test. (D) Average gold particle density for CBM3a labelled cellulose. Asterix represents statistical significance,  $p < 0.0001$  for OE CALPAIN,  $p < 0.05$  for dek1-4, unpaired Student t-test. n=36 WT, 25 OE CALPAIN and 16 dek1-4 epidermal cell walls. Analysis performed on biological duplicates. (E-G) Transmission electron micrographs of outer epidermal cell walls of 10-day old cotyledons showing immunogold labelled CBM3a cellulose binding. Scale bars = 500 nm.

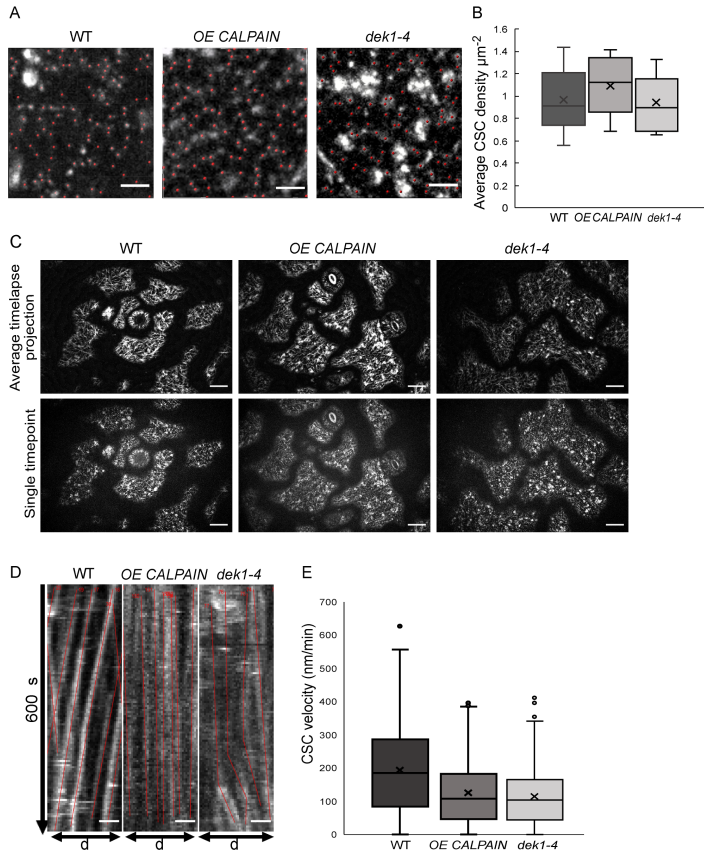

Figure 2. Analysis of cellulose synthase complex (CSC) migration at the plasma membrane in WT and DEK1 modulated Arabidopsis lines. (A) Representative micrographs of 3-day old Arabidopsis cotyledon epidermal pavement cells' membrane patches expressing GFP-CESA3 fluorescent marker used for CSC (red dots) density calculation in Col-0 and DEK1 modulated lines. Scale bars = 2  $\mu\text{m}$ . (B) Box plots showing average density of CESA particles in 3-day old cotyledon pavement cells. n = 6 plants for WT, 31 cells; 6 plants for OE CALPAIN, 33 cells; 6 plants for *dek1-4*, 27 cells. No statistical significance observed between WT and DEK1 modulated lines,  $p=0.5647$  for OE CALPAIN,  $p=0.2705$  for *dek1-4*. (C) Representative images of 3-day old cotyledon epidermal pavement cells used for generation of kymographs. Upper panel represents average projections of time lapses, bottom panel represents a single frame of a corresponding time lapse, n=6 plants per genotype. Scale bars = 10  $\mu\text{m}$ . (D) Representative kymographs showing migration of CESA complexes in 3-day old cotyledon pavement cells of Col-0 and DEK1 modulated lines. Red lines represent trajectories of individual CESA particles. WT, n=6 plants, 937 CSC particles tracked; OE CALPAIN, n=6 plants, 982 CSC particles tracked; *dek1-4*, n=6 plants, 692 CSC particles tracked. Analysis performed on biological duplicates. Scale bars = 10  $\mu\text{m}$ . (E) Box plots represent distribution of CESA velocities, obtained from kymographs. Asterisk represent statistical significance ( $p<0.0001$ , Student t-test).

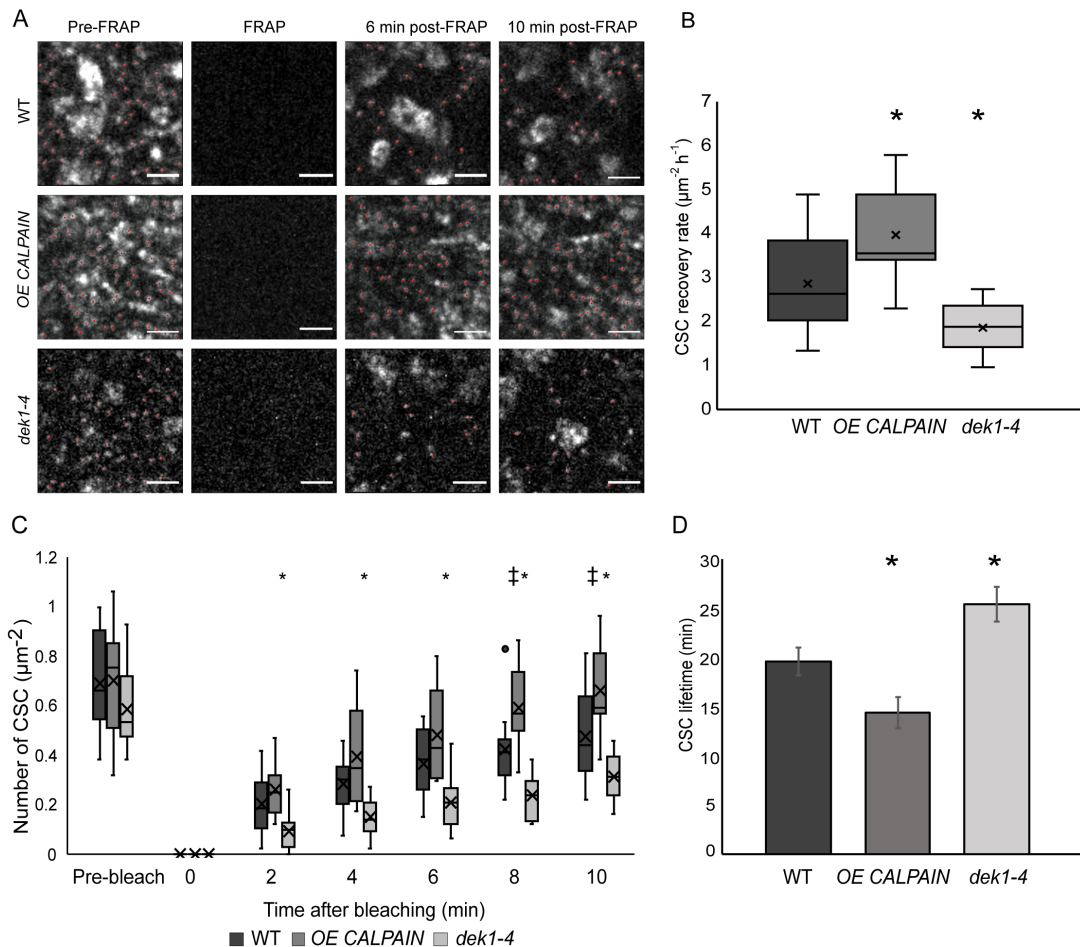

Figure 3. Delivery and resident time of CESAs at the plasma membrane of WT and DEK1 modulated lines in Arabidopsis using fluorescent-recovery after photo-bleaching (FRAP). (A) Representative images showing delivery of new CESA complexes (red dots) after photo-bleaching in 3-day old cotyledon pavement cells of WT, OE CALPAIN, *dek1-4*. Scale bars = 2  $\mu\text{m}$ . (B) Box plots showing average recovery rate of CESA particles following FRAP in cotyledon pavement cells. Asterisk represent statistical significance ( $p < 0.0188$  for OE CALPAIN,  $p < 0.0033$  for *dek1-4*, Student's t-test). (C) Box plots representing recovery of CESA particles after photo-bleaching at each time-point. Symbols above box plots represent statistical significance ( $p = 0.0102$  and  $0.0188$  for OE CALPAIN,  $p = 0.0001-0.0055$  for *dek1-4*, Student's t-test). (D) Histogram representing average lifetime of CESA complexes at the PM. Asterisk above boxplot represents statistical significance ( $p < 0.05$ , Student's t-test), error bars represent standard error. (B-D) Analysis was performed in two biological replicates for WT and *dek1-4*, and one replicate for OE CALPAIN.  $n = 7$  cotyledons for WT, 3 cotyledons for OE CALPAIN, 6 cotyledons for *dek1-4*;  $n = 16$  cells for WT, 9 cells for OE CALPAIN, 14 cells for *dek1-4*.

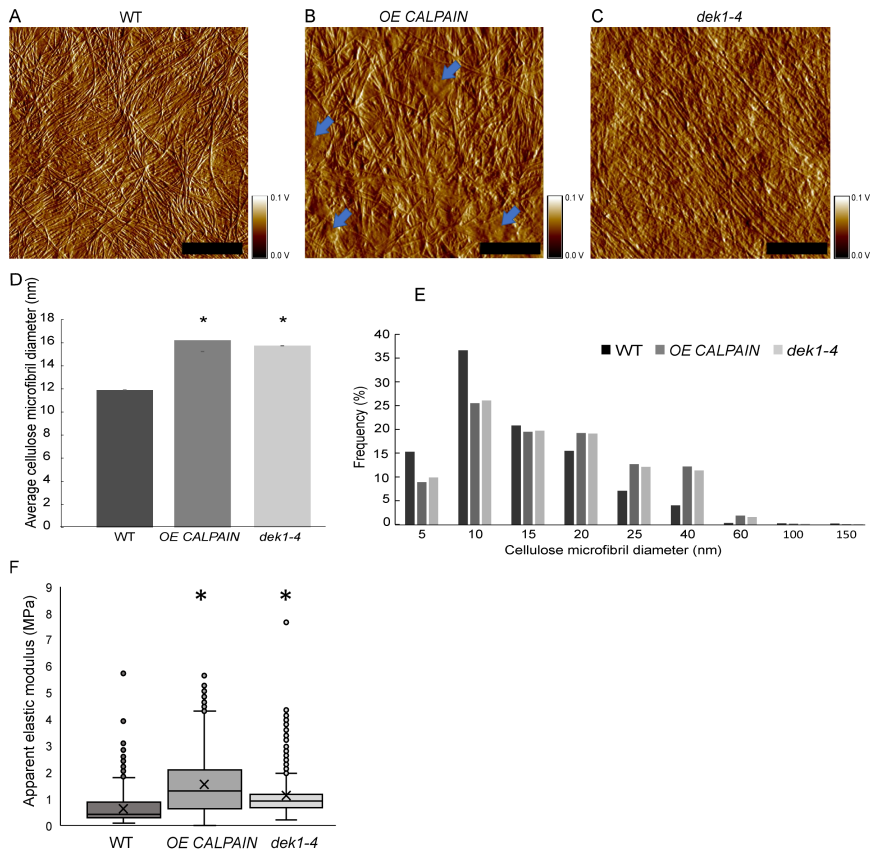

Figure 4. AFM imaging and nanomechanical characterization of outer periclinal cell walls. (A-C) AFM amplitude channel images of the inner face (juxtaposed to the PM) of periclinal primary cell walls in abaxial cotyledon pavement cells of 10-day old seedlings of WT, OE CALPAIN and *dek1-4*. Samples were imaged using tapping mode in air. Arrows indicate amorphous cell wall regions. Scale bars = 250 nm. Corresponding height channel AFM images are shown in Supplementary Figure 8. (D) Histograms representing average thickness of cellulose microfibrils in cotyledon epidermal cell walls. Asterisk represents statistical significance,  $p < 0.0001$ , unpaired Student t-test.  $n = 5$  cotyledons, 10 cells, 1-2 regions per cell for WT;  $n = 6$  plants, 6 cells, 1-2 regions per cell for OE CALPAIN;  $n = 4$  cotyledons, 7 cells, 1-3 regions per cell for *dek1-4*. (E) Distribution of CMF thickness and frequency in WT, OE CALPAIN and *dek1-4*. (F) Box plots representing distribution of cell wall apparent elastic moduli generated after nanoindentation of extracted cotyledon epidermal cell walls in a direction perpendicular to CMFs of 10-day old cotyledons of WT, OE CALPAIN and *dek1-4*.  $n = 12$  indented cotyledons from 12 different plants for WT (1427 indentation points), 9 cotyledons from 9 different plants for OE CALPAIN (1553 indentation points), and 12 cotyledons from 12 different plants for *dek1-4* (1509 indentation points). One cell per one cotyledon was indented in all genotypes. Asterisk represents statistical significance,  $p < 0.0001$ , Student t-test. (A-F) All experiments were performed in two biological replicates.



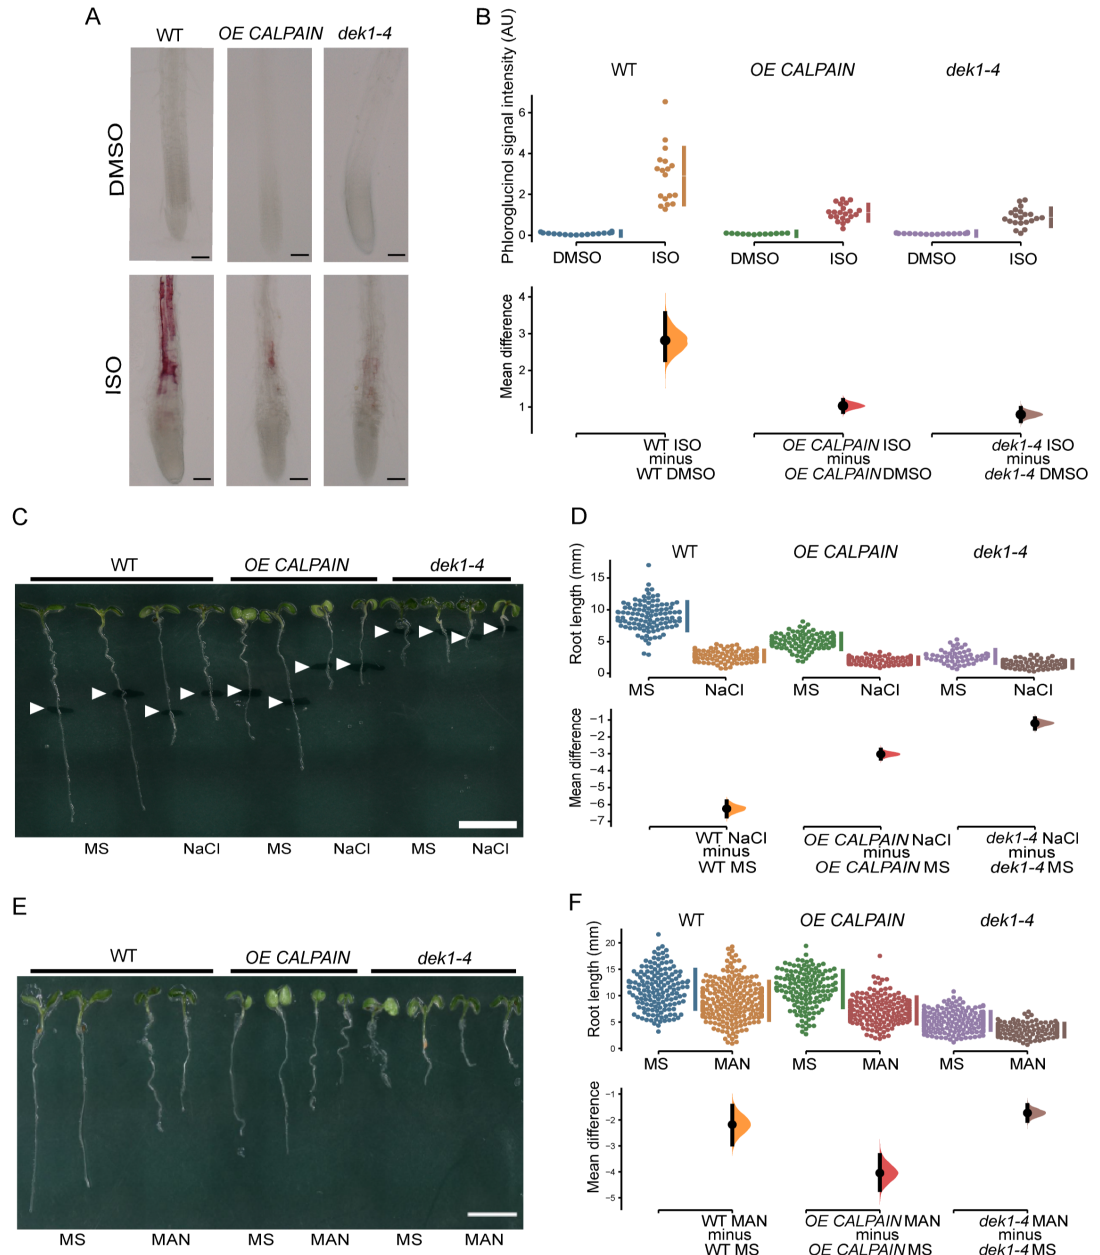

Figure 5. Response of WT and DEK1 modulated Arabidopsis lines to cellulose perturbation, salt and osmotic stress. (A) Phloroglucinol staining of Isoxaben-induced ectopic lignin deposition in elongation region near root tips of 6-day old WT, OE CALPAIN and *dek1-4* seedlings grown in media with either DMSO (control) or 600 nM Isoxaben (ISO). Scale bars = 100  $\mu$ m. (B) Mean difference for arbitrary intensity values of phloroglucinol signal from roots in (A) are shown in the Cumming estimation plot. N = 16 WT DMSO, 18 WT ISO, 12 OE CALPAIN DMSO, 21 OE CALPAIN ISO, 18 *dek1-4* DMSO, 21 *dek1-4* ISO. (C) Representative images of 7-day old WT, OE CALPAIN and *dek1-4* seedlings transferred for 48 h on media supplemented with or without 140 mM NaCl. White arrowheads indicate length of roots at transfer. Scale bar = 5 mm. (D). Mean difference for root length for each genotype between plants grown on control media and plants grown on NaCl supplemented media. N = 107 WT MS, 108 WT NaCl, 95 OE CALPAIN MS, 97 OE CALPAIN NaCl, 53 *dek1-4* MS, 76 *dek1-4* NaCl. (E) Representative image of light-grown 6-day old WT, OE CALPAIN and *dek1-4* seedlings grown on control media (MS) or media supplemented with 200 mM mannitol (MAN). Scale bar = 5 mm. (F) Mean difference for root length for each genotype between plants grown on MS media or media with mannitol. N = 152 WT MS, 230 WT MAN, 140 OE CALPAIN MS, 181 OE CALPAIN MAN, 235 *dek1-4* MS, 133 *dek1-4* MAN. (B,D,F) Mean difference for lignin staining intensity and root length under different experimental conditions are shown in the Cumming estimation plot. The raw data are plotted on the upper axes; each mean difference is plotted on the lower axes as a bootstrap sampling distribution. Mean differences are depicted as dots on the lower panels of Cumming plots; 95% confidence intervals are indicated by the ends of the vertical error bars.

## Parsed Citations

**Amanda D, Doblin MS, Galletti R, Bacic A, Ingram GC, L. JK (2016) DEFECTIVE KERNEL1 (DEK1) regulates cell walls in the leaf epidermis. *Plant Physiology* 172: 2204-2218**

Google Scholar: [Author Only](#) [Title Only](#) [Author and Title](#)

**Amanda D, Doblin MS, MacMillan CP, Galletti R, Golz JF, Bacic A, Ingram GC, Johnson KL (2017) Arabidopsis DEFECTIVE KERNEL1 regulates cell wall composition and axial growth in the inflorescence stem. *Plant Direct* 1: e00027**

Google Scholar: [Author Only](#) [Title Only](#) [Author and Title](#)

**Basu D, Tian L, Debrosse T, Poirier E, Emch K, Herock H, Travers A, Showalter AM (2016) Glycosylation of a Fasciclin-Like Arabinogalactan-Protein (SOS5) Mediates Root Growth and Seed Mucilage Adherence via a Cell Wall Receptor-Like Kinase (FEI1/FEI2) Pathway in Arabidopsis. *PLoS one* 11: e0145092-e0145092**

Google Scholar: [Author Only](#) [Title Only](#) [Author and Title](#)

**Becraft PW, Li K, Dey N, Asuncion-Crabb Y (2002) The maize dek1 gene functions in embryonic pattern formation and cell fate specification. *Development* 129: 5217-5225**

Google Scholar: [Author Only](#) [Title Only](#) [Author and Title](#)

**Bischoff V, Desprez T, Mouille G, Vernhettes S, Gonneau M, Höfte H (2011) Phytochrome regulation of cellulose synthesis in Arabidopsis. *Current Biology* 21: 1822-1827**

Google Scholar: [Author Only](#) [Title Only](#) [Author and Title](#)

**Blackburn MR, Haruta M, Moura DS (2020) Twenty Years of Progress in Physiological and Biochemical Investigation of RALF Peptides1 *Plant Physiology* 182: 1657-1666**

Google Scholar: [Author Only](#) [Title Only](#) [Author and Title](#)

**Blake AW, McCartney L, Flint JE, Bolam DN, Boraston AB, Gilbert HJ, Knox JP (2006) Understanding the biological rationale for the diversity of cellulose-directed carbohydrate-binding modules in prokaryotic enzymes. *Journal of Biological Chemistry* 281: 29321-29329**

Google Scholar: [Author Only](#) [Title Only](#) [Author and Title](#)

**Bouton S, Leboeuf E, Mouille G, Leydecker MT, Talbotec J, Granier F, Lahaye M, Höfte H, Truong HN (2002) QUASIMODO1 encodes a putative membrane-bound glycosyltransferase required for normal pectin synthesis and cell adhesion in Arabidopsis. *The Plant Cell* 14: 2577-2590**

Google Scholar: [Author Only](#) [Title Only](#) [Author and Title](#)

**Bringmann M, Li E, Sampathkumar A, Kocabek T, Hauser M-T, Persson S (2012) POM-POM2/CELLULOSE SYNTHASE INTERACTING1 Is Essential for the Functional Association of Cellulose Synthase and Microtubules in Arabidopsis. *The Plant Cell* 24: 163-177**

Google Scholar: [Author Only](#) [Title Only](#) [Author and Title](#)

**Chaudhary A, Chen X, Gao J, Leśniewska B, Hammerl R, Dawid C, Schneitz K (2020) The Arabidopsis receptor kinase STRUBBELIG regulates the response to cellulose deficiency. *PLOS Genetics* 16**

Google Scholar: [Author Only](#) [Title Only](#) [Author and Title](#)

**Cosgrove DJ (2005) Growth of the plant cell wall. *Nature Reviews Molecular Cell Biology* 6: 850-861**

Google Scholar: [Author Only](#) [Title Only](#) [Author and Title](#)

**Czechowski T, Stitt M, Altmann T, Udvardi MK, Scheible W-R (2005) Genome-Wide Identification and Testing of Superior Reference Genes for Transcript Normalization in Arabidopsis. *Plant Physiology* 139: 5-7**

Google Scholar: [Author Only](#) [Title Only](#) [Author and Title](#)

**Demko V, Perroud P-F, Johansen W, Delwiche CF, Cooper ED, Remme P, Ako AE, Kugler KG, Mayer KFX, Quatrano R, Olsen O-A (2014) Genetic Analysis of DEFECTIVE KERNEL1 Loop Function in Three-Dimensional Body Patterning in *Physcomitrella patens*. *Plant Physiology* 166: 903-919**

Google Scholar: [Author Only](#) [Title Only](#) [Author and Title](#)

**Denness L, McKenna JF, Segonzac C, Wormit A, Madhou P, Bennett M, Mansfield J, Zipfel C, Hamann T (2011) Cell Wall Damage-Induced Lignin Biosynthesis Is Regulated by a Reactive Oxygen Species- and Jasmonic Acid-Dependent Process in Arabidopsis *Plant Physiology* 156: 1364-1374**

Google Scholar: [Author Only](#) [Title Only](#) [Author and Title](#)

**Desprez T, Juraniec M, Crowell EF, Jouy H, Pochylova Z, Parcy F, Höfte H, Gonneau M, Vernhettes S (2007) Organization of cellulose synthase complexes involved in primary cell wall synthesis in Arabidopsis thaliana. *Proceedings of the National Academy of Sciences of the United States of America* 104: 15572-15577**

Google Scholar: [Author Only](#) [Title Only](#) [Author and Title](#)

**Diotallevi F, Mulder B (2007) The cellulose synthase complex: a polymerization driven supramolecular motor. *Biophysical Journal* 92: 2666-2673**

Google Scholar: [Author Only Title Only Author and Title](#)

**Du J, Kirui A, Huang S, Wang L, Barnes WJ, Kiemle SN, Zheng Y, Rui Y, Ruan M, Qi S, Kim SH, Wang T, Cosgrove DJ, Anderson CT, Xiao C (2020) Mutations in the Pectin Methyltransferase QUASIMODO2 Influence Cellulose Biosynthesis and Wall Integrity in Arabidopsis. The Plant Cell 32: 3576-3597**

Google Scholar: [Author Only Title Only Author and Title](#)

**Edwards K, Johnstone C, Thompson C (1991) A simple and rapid method for the preparation of plant genomic DNA for PCR analysis. Nucleic Acids Research 19: 1349**

Google Scholar: [Author Only Title Only Author and Title](#)

**Engelsdorf T, Hamann T (2014) An update on receptor-like kinase involvement in the maintenance of plant cell wall integrity. Annals of Botany 114: 1339-1347**

Google Scholar: [Author Only Title Only Author and Title](#)

**Fagard M, Desnos T, Desprez T, Goubet F, Refregier G, Mouille G, McCann M, Rayon C, Vernhettes S, Höfte H (2000) PROCUSTE1 encodes a cellulose synthase required for normal cell elongation specifically in roots and dark-grown hypocotyls of Arabidopsis. The Plant Cell 12: 2409-2424**

Google Scholar: [Author Only Title Only Author and Title](#)

**Feng W, Kita D, Peaucelle A, Cartwright HN, Doan V, Duan Q, Liu MC, Maman J, Steinhorst L, Schmitz-Thom I, Yvon R, Kudla J, Wu H-M, Cheung AY, Dinneny JR (2018) The FERONIA receptor kinase maintains cell-wall integrity during salt stress through Ca signaling. Current Biology 28: 1-10**

Google Scholar: [Author Only Title Only Author and Title](#)

**Fujita M, Himmelspach R, Hocart CH, Williamson RE, Mansfield SD, Wasteneys GO (2011) Cortical microtubules optimize cell-wall crystallinity to drive unidirectional growth in Arabidopsis. The Plant Journal 66: 915-928**

Google Scholar: [Author Only Title Only Author and Title](#)

**Galletti R, Johnson KL, Scofield S, San-Bento R, Watt AM, Murray JAH, Ingram GC (2015) DEFECTIVE KERNEL 1 promotes and maintains plant epidermal differentiation. Development 142: 1978-1983**

Google Scholar: [Author Only Title Only Author and Title](#)

**Galletti R, Verger S, Hamant O, Ingram GC (2016) Developing a 'thick skin': a paradoxical role for mechanical tension in maintaining epidermal integrity? Development 143: 3249-3258**

Google Scholar: [Author Only Title Only Author and Title](#)

**García Díaz BE, Gauthier S, Davies PL (2006) Ca<sup>2+</sup> Dependency of Calpain 3 (p94) Activation. Biochemistry 45: 3714-3722**

Google Scholar: [Author Only Title Only Author and Title](#)

**Gjetting SK, Mahmood K, Shabala L, Kristensen A, Shabala S, Palmgren M, Fuglsang AT (2020) Evidence for multiple receptors mediating RALF-triggered Ca<sup>2+</sup> signaling and proton pump inhibition. The Plant Journal 104: 433-446**

Google Scholar: [Author Only Title Only Author and Title](#)

**Haas KT, Wightman R, Meyerowitz EM, Peaucelle A (2020) Pectin homogalacturonan nanofilament expansion drives morphogenesis in plant epidermal cells. Science 367: 1003-1007**

Google Scholar: [Author Only Title Only Author and Title](#)

**Hamann T (2014) The Plant Cell Wall Integrity Maintenance Mechanism-Concepts for Organization and Mode of Action. Plant and Cell Physiology 56: 215-223**

Google Scholar: [Author Only Title Only Author and Title](#)

**Hamant O, Heisler MG, Jönsson H, Krupinski P, Uyttewaal M, Bokov P, Corson F, Sahlín P, Boudaoud A, Meyerowitz EM, Couder Y, Traas J (2008) Developmental patterning by mechanical signals in Arabidopsis. Science 322: 1650-1655**

Google Scholar: [Author Only Title Only Author and Title](#)

**Heim DR, Skomp JR, Tschabold EE, Larrinua IM (1990) Isoxaben Inhibits the Synthesis of Acid Insoluble Cell Wall Materials In Arabidopsis thaliana. Plant Physiology 93: 695-700**

Google Scholar: [Author Only Title Only Author and Title](#)

**His I, Driouich A, Nicol F, Jauneau A, Höfte H (2001) Altered pectin composition in primary cell walls of korrigan, a dwarf mutant of Arabidopsis deficient in a membrane-bound endo-1,4-beta-glucanase. Planta 212: 348-358**

Google Scholar: [Author Only Title Only Author and Title](#)

**Ho J, Tumkaya T, Aryal S, Choi H, Claridge-Chang A (2019) Moving beyond P values: data analysis with estimation graphics. Nature Methods 16: 565-566**

Google Scholar: [Author Only Title Only Author and Title](#)

**Hu H, Zhang R, Tang Y, Peng C, Wu L, Feng S, Chen P, Wang Y, Du X, Peng L (2019) Cotton CSLD3 restores cell elongation and cell wall integrity mainly by enhancing primary cellulose production in the Arabidopsis cesa6 mutant. Plant Molecular Biology 101: 389-401**

Google Scholar: [Author Only Title Only Author and Title](#)

**Johnson KL, Degnan KA, Ross Walker J, Ingram GC (2005) AtDEK1 is essential for specification of embryonic epidermal cell fate. *The Plant Journal* 44: 114-127**

Google Scholar: [Author Only Title Only Author and Title](#)

**Johnson KL, Faulkner C, Jeffree CE, Ingram GC (2008) The phytocalpain defective kernel 1 is a novel Arabidopsis growth regulator whose activity is regulated by proteolytic processing. *The Plant Cell* 20: 2619–2630**

Google Scholar: [Author Only Title Only Author and Title](#)

**Johnson KL, Faulkner C., Jeffree, C. E., Ingram, G. C. (2008) The phytocalpain defective kernel 1 is a novel Arabidopsis growth regulator whose activity is regulated by proteolytic processing. *The Plant Cell* 20: 2619–2630**

Google Scholar: [Author Only Title Only Author and Title](#)

**Johnson KL, Gidley MJ, Bacic A, Doblin MS (2018) Cell wall biomechanics: a tractable challenge in manipulating plant cell walls fit for purpose! *Current Opinion in Biotechnology* 49: 163-171**

Google Scholar: [Author Only Title Only Author and Title](#)

**Kafle K, Xi X, Lee CM, Tittmann BR, Cosgrove DJ, Park YB, Kim SH (2014) Cellulose microfibril orientation in onion (*Allium cepa* L.) epidermis studied by atomic force microscopy (AFM) and vibrational sum frequency generation (SFG) spectroscopy. *Cellulose* 21: 1075-1086**

Google Scholar: [Author Only Title Only Author and Title](#)

**Knox JP, Linstead PJ, King J, Cooper C, Roberts K (1990) Pectin esterification is spatially regulated both within cell walls and between developing tissues of root apices. *Planta* 181: 512-521**

Google Scholar: [Author Only Title Only Author and Title](#)

**Kohorn BD, Johansen, S., Shishido, A., Todorova, T., Martinez, R., Defeo, E., Obregon, P. (2009) Pectin activation of MAP kinase and gene expression is WAK2 dependent. *The Plant Journal* 60: 974-982**

Google Scholar: [Author Only Title Only Author and Title](#)

**Lane DR, Wiedemeier A, Peng L, Höfte H, Vernhettes S, Desprez T, Hocart CH, Birch RJ, Baskin TI, Burn JE, Arioli T, Betzner AS, Williamson RE (2001) Temperature-sensitive alleles of RSW2 link the KORRIGAN endo-1,4-beta-glucanase to cellulose synthesis and cytokinesis in Arabidopsis. *Plant Physiol* 126: 278-288**

Google Scholar: [Author Only Title Only Author and Title](#)

**Lid SE, Gruis D, Jung R, Lorentzen JA, Ananiev E, Chamberlin M, Niu X, Meeley R, Nichols S, Olsen O-A (2002) The defective kernel 1 (*dek1*) gene required for aleurone cell development in the endosperm of maize grains encodes a membrane protein of the calpain gene superfamily. *Proceedings of the National Academy of Sciences of the United States of America* 99: 5460-5465**

Google Scholar: [Author Only Title Only Author and Title](#)

**Livak KJ, Schmittgen TD (2001) Analysis of relative gene expression data using real-time quantitative PCR and the 2(- $\Delta\Delta C_t$ ) Method. *Methods* 25**

Google Scholar: [Author Only Title Only Author and Title](#)

**Lopez-Sanchez P, Cersosimo J, Wang D, Flanagan B, Stokes JR, Gidley MJ (2015) Poroelastic Mechanical Effects of Hemicelluloses on Cellulosic Hydrogels under Compression. *PLOS one* 10: e0122132**

Google Scholar: [Author Only Title Only Author and Title](#)

**Marcus SE, Verherbruggen Y, Herve C, Ordaz-Ortiz JJ, Farkas V, Pedersen HL, Willats WG, Knox JP (2008) Pectic homogalacturonan masks abundant sets of xyloglucan epitopes in plant cell walls. *BMC Plant Biology* 8: 60**

Google Scholar: [Author Only Title Only Author and Title](#)

**Mouille G, Ralet MC, Cavelier C, Eland C, Effroy D, Hématy K, McCartney L, Truong HN, Gaudon V, Thibault JF, Marchant A, Höfte H (2007) Homogalacturonan synthesis in Arabidopsis thaliana requires a Golgi-localized protein with a putative methyltransferase domain. *The Plant Journal* 50: 605-614**

Google Scholar: [Author Only Title Only Author and Title](#)

**Moullia B, Douady S, Hamant O (2021) Fluctuations shape plants through proprioception. *Science* 372: eabc6868**

Google Scholar: [Author Only Title Only Author and Title](#)

**Neff MM, Neff JD, Chory J, Pepper AE (1998) dCAPS, a simple technique for the genetic analysis of single nucleotide polymorphisms: experimental applications in Arabidopsis thaliana genetics. *The Plant Journal* 14: 387-392**

Google Scholar: [Author Only Title Only Author and Title](#)

**Nixon BT, Mansouri K, Singh A, Du J, Davis JK, Lee J-G, Slabaugh E, Vandavasi VG, O'Neill H, Roberts EM, Roberts AW, Yingling YG, Haigler CH (2016) Comparative Structural and Computational Analysis Supports Eighteen Cellulose Synthases in the Plant Cellulose Synthesis Complex. *Scientific Reports* 6: 28696**

Google Scholar: [Author Only Title Only Author and Title](#)

**Ono Y, Sorimachi H (2012) Calpains: an elaborate proteolytic system. *Biochim Biophys Acta* 1824: 224-236**

Google Scholar: [Author Only Title Only Author and Title](#)

**Paredes AR, Somerville CR, Ehrhardt DW (2006) Visualization of cellulose synthase demonstrates functional association with microtubules. *Science* 312: 1491-1495**

Google Scholar: [Author Only Title Only Author and Title](#)

**Persson Sea (2007) Genetic evidence for three unique components in primary cell-wall cellulose synthase complexes in Arabidopsis. Proc. Natl. Acad. Sci. U.S.A. 104: 15566–15571**

Google Scholar: [Author Only Title Only Author and Title](#)

**Pettolino FA, Walsh C, Fincher GB, Bacic A (2012) Determining the polysaccharide composition of plant cell walls. Nat Protoc 7: 1590-1607**

Google Scholar: [Author Only Title Only Author and Title](#)

**Polko JK, Kieber JJ (2019) The Regulation of Cellulose Biosynthesis in Plants. The Plant Cell 31: 282-296**

Google Scholar: [Author Only Title Only Author and Title](#)

**Roeder AHK, Cunha A, Ohno CK, Meyerowitz EM (2012) Cell cycle regulates cell type in the Arabidopsis sepal. Development 139: 4416-4427**

Google Scholar: [Author Only Title Only Author and Title](#)

**Ruhnaw F, Zwicker D, Diez S (2011) Tracking single particles and elongated filaments with nanometer precision. Biophysical Journal 100: 2820-2828**

Google Scholar: [Author Only Title Only Author and Title](#)

**Sampathkumar A, Gutierrez R, McFarlane HE, Bringmann M, Lindeboom J, Emons A-M, Samuels L, Ketelaar T, Ehrhardt DW, Persson S (2013) Patterning and Lifetime of Plasma Membrane-Localized Cellulose Synthase Is Dependent on Actin Organization in Arabidopsis Interphase Cells. Plant Physiology 162: 675-688**

Google Scholar: [Author Only Title Only Author and Title](#)

**Sánchez-Rodríguez C, Ketelaar K, Schneider R, Villalobos JA, Somerville CR, Persson S, Wallace IS (2017) BRASSINOSTEROID INSENSITIVE2 negatively regulates cellulose synthesis in Arabidopsis by phosphorylating cellulose synthase 1. Proc. Natl. Acad. Sci. U.S.A. 114: 3533–3538**

Google Scholar: [Author Only Title Only Author and Title](#)

**Shim I, Law R, Kileeg Z, Stronghill P, Northey JGB, Strap JL, Bonetta DT (2018) Alleles Causing Resistance to Isoxaben and Flupoxam Highlight the Significance of Transmembrane Domains for CESA Protein Function. Frontiers in Plant Science 9**

Google Scholar: [Author Only Title Only Author and Title](#)

**Stegmann M, Monaghan J, Smakowska-Luzan E, Rovenich H, Lehner A, Holton N, Belkhadir Y, Zipfel C (2017) The receptor kinase FER is a RALF-regulated scaffold controlling plant immune signaling. Science 355: 287-289**

Google Scholar: [Author Only Title Only Author and Title](#)

**Tenhaken R (2014) Cell wall remodeling under abiotic stress. Frontiers in Plant Science 5: 771**

Google Scholar: [Author Only Title Only Author and Title](#)

**Tonami K, Kurihara Y, Arima S, Nishiyama K, Uchijima Y, Asano T, Sorimachi H, Kurihara H (2011) Calpain-6, a microtubule-stabilizing protein, regulates Rac1 activity and cell motility through interaction with GEF-H1. Journal of Cell Science 124: 1214-1223**

Google Scholar: [Author Only Title Only Author and Title](#)

**Tran D, Galletti R, Neumann ED, Dubois A, Sharif-Naeini R, Geitmann A, Frachisse JM, Hamant O, Ingram GC (2017) A mechanosensitive Ca<sup>2+</sup> channel activity is dependent on the developmental regulator DEK1. Nature Communications 8**

Google Scholar: [Author Only Title Only Author and Title](#)

**Updegraff DM (1969) Semimicro determination of cellulose in biological materials. Analytical Biochemistry 32: 420-424**

Google Scholar: [Author Only Title Only Author and Title](#)

**Vaahtera L, Schulz J, Hamann T (2019) Cell wall integrity maintenance during plant development and interaction with the environment. Nature Plants 5: 924-932**

Google Scholar: [Author Only Title Only Author and Title](#)

**Vain T, Crowell EF, Timpano H, Biot E, Desprez T, Mansoori N, Trindade LM, Pagant S, Robert S, Höfte H, Gonneau M, Vernhettes S (2014) The Cellulase KORRIGAN Is Part of the Cellulose Synthase Complex. Plant Physiology 165: 1521-1532**

Google Scholar: [Author Only Title Only Author and Title](#)

**Verger S, Long Y, Boudaoud A, Hamant O (2018) A tension-adhesion feedback loop in plant epidermis. eLife 7: e34460**

Google Scholar: [Author Only Title Only Author and Title](#)

**Wang C, Barry JK, Min Z, Tordsen G, Rao AG, Olsen OA (2003) The calpain domain of the maize DEK1 protein contains the conserved catalytic triad and functions as a cysteine proteinase. Journal of Biological Chemistry 278: 34467-34474**

Google Scholar: [Author Only Title Only Author and Title](#)

**Wang T, Park YB, Cosgrove DJ, Hong M (2015) Cellulose-Pectin Spatial Contacts Are Inherent to Never-Dried Arabidopsis Primary Cell Walls: Evidence from Solid-State Nuclear Magnetic Resonance Plant Physiology 168: 871-884**

Google Scholar: [Author Only Title Only Author and Title](#)

**Wang X, Wilson L, Cosgrove DJ (2020) Pectin methylesterase selectively softens the onion epidermal wall yet reduces acid-induced creep. *Journal of Experimental Botany* 71: 2629-2640**

Google Scholar: [Author Only Title Only Author and Title](#)

**Wilson SM, Bacic A (2012) Preparation of plant cells for transmission electron microscopy to optimize immunogold labeling of carbohydrate and protein epitopes. *Nature Protocols* 7: 1716-1727**

Google Scholar: [Author Only Title Only Author and Title](#)

**Xiao C, Anderson CT (2016) Interconnections between cell wall polymers, wall mechanics, and cortical microtubules: Teasing out causes and consequences. *Plant signaling & behavior* 11: e1215396-e1215396**

Google Scholar: [Author Only Title Only Author and Title](#)

**Xiao C, Zhang T, Zheng Y, Cosgrove DJ, Anderson CT (2016) Xyloglucan Deficiency Disrupts Microtubule Stability and Cellulose Biosynthesis in Arabidopsis, Altering Cell Growth and Morphogenesis. *Plant Physiology* 170: 234-249**

Google Scholar: [Author Only Title Only Author and Title](#)

**Yakubov GE, Bonilla MR, Chen H, Doblin MS, Bacic A, Gidley MJ, Stokes JR (2016) Mapping nano-scale mechanical heterogeneity of primary plant cell walls. *Journal of Experimental Botany* 67: 2799-2816**

Google Scholar: [Author Only Title Only Author and Title](#)

**Yang Y, Yu Y, Liang Y, Anderson CT, Cao J (2018) A Profusion of Molecular Scissors for Pectins: Classification, Expression, and Functions of Plant Polygalacturonases. *Frontiers in Plant Science* 9: 1208**

Google Scholar: [Author Only Title Only Author and Title](#)

**Zhang T, Tang H, Vavylonis D, Cosgrove DJ (2019) Disentangling loosening from softening: insights into primary cell wall structure. *The Plant Journal* 100: 1101-1117**

Google Scholar: [Author Only Title Only Author and Title](#)

**Zhang T, Zheng Y, Cosgrove DJ (2016) Spatial organization of cellulose microfibrils and matrix polysaccharides in primary plant cell walls as imaged by multichannel atomic force microscopy. *The Plant Journal* 85: 179-192**

Google Scholar: [Author Only Title Only Author and Title](#)

**Zhang X, Yang Z, Wu D, Yu F (2020) RALF-FERONIA Signaling: Linking Plant Immune Response with Cell Growth. *Plant Communications* 1: 100084**

Google Scholar: [Author Only Title Only Author and Title](#)

**Zhu X, Li S, Pan S, Xin X, Gu Y (2018) CSI1, PATROL1, and exocyst complex cooperate in delivery of cellulose synthase complexes to the plasma membrane. *Proceedings of the National Academy of Sciences* 115: E3578-E3587**

Google Scholar: [Author Only Title Only Author and Title](#)
